High-throughput transposon sequencing highlights cell wall as an  
important barrier for osmotic stress in methicillin resistant  
*Staphylococcus aureus* and underlines a tailored response to different  
osmotic stressors

*Short Title: Global analysis of osmotic stress responses in Staphylococcus aureus*

**Christopher F. Schuster<sup>a</sup>, David M. Wiedemann<sup>a</sup>, Freja C. M. Kirsebom<sup>a,1</sup>, Marina Santiago<sup>b,2</sup>,  
Suzanne Walker<sup>b</sup> and Angelika Gründling<sup>a,3</sup>**

ORCID IDs: 0000-0002-4566-7226 (CFS), 0000-0001-6961-0980 (DMW), 0000-0003-4585-319X  
(FCK), 0000-0002-5446-3452 (MS), 0000-0002-0545-914X (SW), 0000-0002-6235-8687 (AG)

<sup>a</sup>Section of Microbiology and MRC Centre for Molecular Bacteriology and Infection, Imperial  
College London, London, SW7 2AZ, U.K.

<sup>b</sup>Department of Microbiology and Immunobiology, Harvard Medical School, Boston, MA 02115,  
U.S.A.

<sup>1</sup>Current address: Section of Respiratory Infections, National Heart and Lung Institute, Imperial  
College London, London, W2 1PG, U.K.

<sup>3</sup>To whom correspondence should be addressed. Email: [a.grundling@imperial.ac.uk](mailto:a.grundling@imperial.ac.uk)

Keywords: osmotic stress, TN-seq, Tradis, NaCl, KCl, Sucrose, *S. aureus*, DUF25380, Pbp2

## 1 **Abstract**

2 *Staphylococcus aureus* is an opportunistic pathogen that causes a variety of diseases. It presents a  
3 problem in hospitals as well as communities partly due to the acquisition of multiple antibiotic  
4 resistances, which make infections difficult to treat. *S. aureus* is also a frequent cause of foodborne  
5 illnesses due to its ability to produce heat stable toxins that cause nausea, vomiting and diarrhoea  
6 even in the absence of living cells. One contributing factor for the food association is its high salt  
7 tolerance, which allows this organism to survive commonly used methods of food preservation. How  
8 this resistance is mediated is poorly understood. In this study, we used TN-seq-based high  
9 throughput screens to find genes that are involved in the salt tolerance of *S. aureus* and identified  
10 the previously uncharacterized DUF2538 domain containing gene *SAUSA300\_0957* (gene *957*) as  
11 essential under salt stress. Further experiments revealed that a *957* mutant strain is less susceptible  
12 to oxacillin and shows increased peptidoglycan crosslinking. The salt sensitivity phenotype could be  
13 suppressed by point mutations in the transglycosylase domain of the penicillin binding protein gene  
14 *pbp2*, and these mutations also restored the peptidoglycan crosslinking to WT levels. These results  
15 indicate that increased crosslinking of the peptidoglycan can be detrimental and highlight the role  
16 of the bacterial cell wall for osmotic stress resistance. To gain more information on the general  
17 osmotic stress response of *S. aureus* and how responses differ between different osmotic stressors,  
18 additional TN-seq studies were performed with KCl and sucrose. Although it is generally assumed  
19 that a generic osmotic stress response exists, our results revealed distinctly different long-term  
20 responses to NaCl, KCl and sucrose stress. Using a global and genome-wide TN-seq approach, we  
21 were able to link numerous previously unknown factors to the osmotic stress response in *S. aureus*.  
22 This study will also serve as a starting point for future research in osmotic stress and might help us  
23 develop strategies to tackle foodborne staphylococcal infections.

## 24 Introduction

25 *Staphylococcus aureus* is a Gram-positive bacterium that is carried by about 20% of healthy  
26 individuals [1]. It is also an opportunistic pathogen causing a variety of diseases, including  
27 bacteremia, endocarditis, soft tissue infections and food poisoning [2]. One characteristic of *S.*  
28 *aureus* is its ability to grow in the presence of a very high salt concentration up to 2.5 M, conditions  
29 under which other bacteria are unable to survive [3], and this has been used extensively for the  
30 isolation of staphylococci. This salt tolerance also allows *S. aureus* to thrive in its niches such as the  
31 human nares, skin [1] and certain food products [4].

32 In general, the bacterial cytoplasm is hyperosmotic to the environment and can therefore  
33 tolerate a certain level of external osmotic stress. However, an increase in the intracellular sodium  
34 concentration can lead to mis- and unfolding of proteins and inhibit enzymatic reactions. Hence, *S.*  
35 *aureus* must possess strategies to counter the effects of osmotic damage, but these are poorly  
36 understood, as most work has been performed in *Escherichia coli* and *Bacillus subtilis*, which possess  
37 much lower salt tolerances than Staphylococci.

38 General mechanisms of osmotic stress mitigation are the rapid import of potassium into the cell  
39 to reduce the influx of sodium and efflux of water [5-7]. However, during prolonged NaCl stress,  
40 potassium levels decrease again after its initial accumulation in the cytoplasm of *S. aureus* [8, 9].  
41 Instead, *S. aureus* accumulates small osmotically active compounds, named compatible solutes [3].  
42 The most effective compatible solutes in *S. aureus* are glycine betaine and proline [3, 10-14], which  
43 are imported by specific osmolyte transporters [13, 14]. These preferred osmolytes can accumulate  
44 in the cell to very high concentrations without negatively affecting cellular processes [6]. In addition,  
45 *S. aureus* can also synthesize compatible solutes *de novo*, as in the case of glutamine [12], but this  
46 process is much slower than the uptake of osmolytes and requires more energy.

47 Consistent with these observations, previous research studying the underlying genetic factors  
48 of the *S. aureus* osmotic stress response implicated several osmolyte transporters in this process  
49 [15-19]. These include the potassium transport systems Kdp and Ktr [15], the proline transporter  
50 PutP [17, 19], the arsenic transport system Ars [16] and the branched chain amino acid uptake  
51 system BrnQ [18]. In addition, although currently not experimentally verified, it can be assumed that  
52 the main glycine betaine uptake system OpuD [20, 21] is an important factor for osmotic adaptation  
53 as glycine betaine uptake reduces sensitivity to NaCl exposure significantly [10].

54 Despite these multiple countermeasures, exposure of *S. aureus* to high salt concentrations also  
55 leads to morphological changes, including the formation of larger cells [22] and a thickening of the  
56 cell wall [23]. However, if and which genetic factors are required for those processes are currently  
57 not well understood. The cell wall of Gram-positive bacteria is an important barrier against osmotic  
58 stresses and acts as a counterpart to the pressurized cytoplasm. A major component of the cell wall  
59 is peptidoglycan, a polymer consisting of chains of repeating N-acetylglucosamine (GlcNAc) and N-  
60 acetylmuramic acid (MurNAc) units that are crosslinked with neighboring chains via short peptides  
61 and, in the case of *S. aureus*, pentaglycine cross-bridges (Reviewed by [24]). In the past, the  
62 contribution of the cell wall towards osmotic stress resistance was often not considered in the  
63 bacterial osmotic stress resistance field, presumably because the integrity of the cell wall was  
64 assumed to be a prerequisite rather than an active adaptation to survive osmotic stresses.  
65 Nevertheless, several possible changes to the cell wall have been observed *in S. aureus* during NaCl  
66 stress, such as shortened interpeptide bridges in the peptidoglycan [22], an increase in resistance  
67 to methicillin [25] and increased autolysis activity [26, 27]. In addition to peptidoglycan, other  
68 components within the cell envelope, such as teichoic acids and more specifically their modifications  
69 with D-alanine [28] and sugar residues [29, 30] are affected by osmotic stress. Combined, these  
70 findings indicate that the integrity of the cell wall is an important requirement for osmotic  
71 resistance.



72 Most studies on osmotic stress in *S. aureus* have been conducted with NaCl as osmotic stressor.  
73 The ionic properties of NaCl have important implications on protein stability and activity as its  
74 accumulation can lead to denaturation of proteins. A few studies in *S. aureus* have also been  
75 performed with non-ionic osmotic stressors such as sucrose, sorbitol glycerol and amino acids [17,  
76 31-33]. These different stresses are often used synonymously with osmotic stress, in part influenced  
77 by the findings that the initial mitigation of osmotic stress by either salts or sugars can be prevented  
78 by the accumulation of potassium and compatible solutes. However, there are potential differences  
79 in the long-term adaptation to ionic and non-ionic osmotic stressors, which have not been  
80 investigated in detail up to date. It is currently also not known if adaptations besides the  
81 accumulation of potassium and osmolytes are similar or differ depending on the osmotic stressor,  
82 and this was addressed as part of this study.

83 Using a transposon insertion sequencing (TN-seq) method [34], we determined on a whole  
84 genome level genes that are essential or dispensable during long-term osmotic stress caused by the  
85 exposure to NaCl. Several unknown and understudied genes were identified as essential under salt  
86 stress including *SAUSA300\_0957*, coding for a cytoplasmic protein, which we show here is important  
87 for peptidoglycan homeostasis in *S. aureus*. Another protein, which we identified as important  
88 during salt stress and essential for peptidoglycan synthesis, is the penicillin binding protein Pbp2,  
89 again highlighting a key function of peptidoglycan during NaCl-induced salt stress. To determine  
90 how the response varies depending on the osmolyte used, TN-seq screens were also performed in  
91 the presence of KCl and sucrose. This yielded very different sets of essential and dispensable  
92 candidate genes, providing experimental evidence of the distinct nature of these stresses and linking  
93 a number of previously unknown factors to the osmotic stress response in *S. aureus*.

94

## 95 **Results**

### 96 **TN-seq analysis identifies *S. aureus* genes involved in NaCl stress**

97 To identify genes involved in the *S. aureus* salt stress response, two independent transposon  
98 sequencing (TN-seq) screens were conducted at different salt concentrations and generation times  
99 (Figure 1A). A multiplexed transposon library, generated using 6 different transposons possessing  
100 different or no promoters [34, 35], was used in replicate A and an independent Tn-library using a  
101 transposon without an outward facing promoter was used in replicate B. In both experiments, LB  
102 medium with either the normal salt concentration of 85 mM NaCl (LBN), LB medium with extra  
103 0.25M NaCl or LB medium with extra 0.5 M NaCl was used (See Supplementary Table S1 for a list of  
104 all TN-seq experiments). Monitoring bacterial growth over seventeen generations, revealed that  
105 growth in LB 0.25M NaCl was comparable to that of cells grown in LBN (Figure 1B), whereas a strong  
106 reduction in growth was seen in the presence of 0.5M NaCl (Figure 1B). For the TN-seq analysis,  
107 samples were taken after 10 and 17 doublings. As expected, the Tn insertions were distributed  
108 evenly throughout the genome when the bacteria were propagated in LBN but became more  
109 unbalanced at higher salt concentrations and longer generation times due to the enrichment of  
110 better salt-adapted TN-strains (Supplementary Figure 1). The fold-change of transposon insertions  
111 per gene under the salt stress conditions compared to the LBN condition (input library) as well as q-  
112 values (false discovery rate according to Benjamini-Hochberg) were determined for each gene  
113 (Supplementary Table S2 & 3). The data were also plotted as volcano plots (Figure 1C), in which  
114 negative values on the x-axis indicate genes that are essential under high salt conditions (fewer TN  
115 insertions in high salt), whereas positive values indicate dispensable genes, for which an inactivation  
116 might be beneficial under high salt conditions. For replicate A, after 10 generations in the presence  
117 of 0.25M NaCl the number of TN insertions per gene was not drastically altered compared to LBN  
118 (Figure 1C, top row). An increase in the salt concentration with the same number of generations

119 slightly increased the number of essential and dispensable genes, but the number was still quite low  
120 (Figure 1C, top row). Extending the growth to 17 generations (Figure 1C, second row) increased the  
121 number of genes with significant differences in the number of TN-insertions during growth at 0.25  
122 M NaCl and even more so at 0.5 M NaCl, indicating a much more stringent depletion or enrichment  
123 of strains with TN-insertions in specific genes from the input library. Therefore, the TN-seq  
124 experiment for replicate B was only performed with 17 generation samples (Figure 1C, bottom row;  
125 Supplementary Table 3). Lists of the top common shared genes between conditions were created  
126 (Supplementary Tables S4-7) and the reproducibility between experiments was also assessed by a  
127 principal component analysis (PCA) (Figure 1D). For the 17 generation data sets, a clear difference  
128 between cells grown in either 0.25 M (orange ellipse) or 0.5 M NaCl (red ellipse) was observable and  
129 experimental data points clustered together for each condition. The 0.25 and 0.5 M NaCl data from  
130 the 10 generation experiment, which was only conducted once, clustered both closely with the 17  
131 generation 0.25 M NaCl samples, consistent with considerably fewer changes in depleted or  
132 enriched TN-strains under these conditions as compared to growth for 17 generations in LB 0.5 M  
133 NaCl. From this analysis we concluded that growing *S. aureus* for 17 generations in 0.5 M NaCl  
134 medium provides sufficiently stringent conditions to identify genes that are either essential or  
135 dispensable in high salt conditions and our further analysis focused on these data sets.

136

137 **The TN-seq screens highlight the essentiality of transporter and cell envelope related genes and**  
138 **the dispensability of respiration genes under high salt conditions**

139 To provide a visual and genome wide guide to the cellular functions of salt essential or dispensable  
140 genes, Voronoi maps were generated for the 17 generation 0.5 M NaCl datasets [36, 37]. For this  
141 global visualization, the observed decrease (essential genes) or increase (dispensable genes) in Tn  
142 insertions per gene compared to LBN medium were plotted regardless of their p-value

143 (Supplementary Figures 2 and 3). In both replicates, genes coding for transporters and cell envelope  
144 related genes were the most prominent conditionally salt essential genes (Supplementary Figure 2).  
145 More specifically, the TN-Seq data indicated that inactivation of the putative magnesium  
146 transporter MgtE [38] and the putative D-serine/D-alanine/glycine transporter AapA is detrimental  
147 under salt stress. Inactivation of AapA has previously been shown to suppress the temperature  
148 sensitivity phenotype seen in an *S. aureus* *fmtC/mprF* mutant [39] and to lead to increased  
149 amoxicillin and daptomycin sensitivity [35, 40]. In addition, the *dlt* operon, coding for enzymes  
150 required for the D-alanylation of teichoic acids, an important factor for cationic peptide resistance  
151 [41], as well as the stationary and stress sigma factor gene *sigB* were found to be essential.  
152 An even larger number of genes was identified as dispensable during salt stress (Supplementary  
153 Figure 3). Inactivating or reducing the expression of such genes is expected to help *S. aureus* survive  
154 under salt stress. Among these dispensable genes were genes coding for the sodium antiporter  
155 Mnh2, which has previously been shown to transport  $\text{Na}^+/\text{H}^+$  and  $\text{K}^+/\text{H}^+$  in high pH medium and to  
156 play an important role in cytoplasmic pH maintenance [42]. Strikingly, a large number of genes  
157 involved in respiration, such as the *cta/qox/men/hem* operons as well as genes involved indirectly  
158 in respiration through quinone synthesis (shikimate pathway, *aro* operon) were also identified as  
159 dispensable during salt stress. Curiously, the data also reproducibly indicated that genes coding for  
160 the phosphodiesterases GdpP and Pde2 involved in degradation of the signaling molecule c-di-AMP  
161 are dispensable under high salt conditions. Somewhat contradictory, the construction of a *dacA*  
162 mutant coding for the cognate c-di-AMP cyclase DacA was only possible at high salt concentrations  
163 (or in defined chemical medium) [21]; but altogether these findings confirm the involvement of c-  
164 di-AMP in salt mediated osmotic stress adaption in *S. aureus*.

## 165 **Confirmation of genes essential during salt stress using individual mutants**

166 To determine to what extent different genes identified in the TN-seq screen contribute to the salt  
167 resistance of *S. aureus*, a set of candidate genes from the top hits of the 17 generations, 0.5 M NaCl  
168 LB dataset B were chosen for further analysis. For this analysis we used defined transposon mutants  
169 available from the *S. aureus* NTML transposon mutant library [43] (Supplementary Table S8). Most  
170 of the chosen genes showed similar trends in dataset A, but intriguingly two of the tested genes,  
171 *rsbV* and *rsbW*, were flagged as highly dispensable in dataset A but as essential in dataset B. Since  
172 no strains with transposon insertions in the *dlt* operon were available in the NTLM transposon  
173 mutant library the contribution of these genes to the salt stress resistance was not further  
174 investigated.

175 Next, the growth of the different NTML transposon mutant strains was assessed in LBN and LB 0.5  
176 M NaCl medium. In LBN medium, most strains grew similarly to the WT strain JE2, indicating that  
177 inactivation of the respective gene does not greatly affect bacterial growth in normal LB medium  
178 (Figures 2A-D, left panels). Exceptions were strains NE1109 (*sigB*) (Figure 2A), NE1778 (*lcpB*) (Figure  
179 2B) and NE188 (*mfd*) (Figure 2C), cultures of which reached slightly lower final optical densities. At  
180 high osmolarity conditions (LB 0.5 M NaCl), all strains showed a growth defect compared to the WT  
181 strain (Figures 2A-D), validating TN-seq as a method to identify genes important in *S. aureus* during  
182 salt stress. Several strains exhibited strong growth defects in the presence of 0.5 M NaCl (Figures 2C  
183 and D) with strain NE1384 (*SAUSA300\_0957*) showing extremely reduced growth (Figure 2D). To  
184 confirm that the salt sensitivity was mediated by the inactivation of the genes in questions, we  
185 constructed complementation plasmids for seven of the most promising candidates by either  
186 expressing the gene of interest from its native promoter or an anhydrotetracycline (Atet) inducible  
187 promoter in the transposon mutant strains. While no complementation was observed for four  
188 strains (Supplementary Figures 4A and B), the salt-dependent growth defect could be  
189 complemented for strains carrying mutations in *SAUSA300\_0694* (Figure 3A), *SAUSA300\_0910*

190 (*mgtE*) and *SAUSA300\_0957* (Figure 3B). *SAUSA300\_0694* encodes a hypothetical protein with 6  
191 predicted transmembrane helices but no other identifiable domain motif. MgtE (*SAUSA300\_0910*)  
192 is a predicted magnesium transporter. *SAUSA300\_0957* (from here on also referred to as gene *957*)  
193 codes for a cytoplasmic protein of unknown function and was further investigated in this study  
194 because a *957* mutant exhibited the strongest salt-sensitivity phenotype.

### 195 **Genomic organization of *957* suggests a potential function in cell envelope homeostasis**

196 *SAUSA300\_0957* encodes a protein with a DUF2538 domain of unknown function. Proteins with this  
197 domain are found mainly in Gram-positive bacteria (Actinobacteria and Firmicutes) (based on an  
198 Interpro search, <https://www.ebi.ac.uk/interpro/entry/IPR024469>). Although a crystal structure of  
199 the *957* protein has been deposited in the PDB (3KBY), to our knowledge nothing is known about  
200 the actual cellular function of this protein. Transcriptome data [44] suggest that gene *957* is in an  
201 operon with *lcpB* (Figure 4A). LcpB is one of three wall teichoic acid (WTA) ligases present in *S.*  
202 *aureus* that attaches WTA to the peptidoglycan polymer [45-47]. Inactivation of LcpB leads to slightly  
203 lower WTA levels in the cell wall, whereas deletion of all three WT ligases completely abolishes WTA  
204 anchoring to the cell wall [45]. In addition, LcpB cell wall ligase activity was demonstrated *in vitro*  
205 [47]. *fmtA* is located upstream of the *957* operon and has been proposed to code for an esterase  
206 that can remove D-alanine modifications from teichoic acids [48] and is involved in methicillin  
207 resistance [49]. Genes coding for a predicted acetyltransferase and *atl* coding for the major *S. aureus*  
208 autolysin are found immediately downstream of the *957* operon [50]. In this early work, gene *957*  
209 was first described as an ORF of “unknown function”. Since functionally related genes often cluster  
210 together in bacteria, this prompted us to next look at cell-envelope related phenotypes for a *957*  
211 deletion strain.

## 212 **Deletion of gene 957 causes physiological changes leading to a smaller cell size**

213 As all previous experiments were performed with transposon mutants, we first constructed strain  
214 LAC\* $\Delta$ 957 with a marker-less in-frame deletion of gene 957. Strain LAC\* $\Delta$ 957 had the expected  
215 growth defect in the presence of 0.5 M NaCl, which could be complemented by expressing a  
216 functional copy of 957 (Figure 4B). We then proceeded to test if the 957 mutant displays other  
217 phenotypes and to investigate if gene 957 is involved in cell envelope homeostasis. First, WT LAC\*,  
218 the 957 mutant and the complementation strain were grown in LBN and the ratio of colony forming  
219 units to optical density (CFU/OD) was determined. The CFU/OD ratio was significantly larger for the  
220 957 mutant ( $60.8 \pm 6.8 \times 10^7$  CFU/OD) mutant as compared to strain LAC\* ( $37.5 \pm 9.3 \times 10^7$  CFU/OD)  
221 when grown in LBN, suggesting a change in cell shape or size (Figure 4C). This phenotype was  
222 restored in the complementation strain ( $37.3 \pm 3.6 \times 10^7$  CFU/OD) (Figure 4C). When the average cell  
223 diameter was determined by microscopy, a small but significant reduction in cell diameter was seen  
224 for the 957 mutant ( $1.25 \pm 0.02 \mu\text{m}$ ) as compared to the WT ( $1.36 \pm 0.03 \mu\text{m}$ ) and the cell size was  
225 restored to wild type levels in the complementation strain ( $1.35 \pm 0.05 \mu\text{m}$ ) (Figure 4D).

## 226 **Salt sensitivity of 957 is not due to interaction with LcpB but likely due to changes in peptidoglycan** 227 **crosslinking**

228 Since the gene 957 is on the same transcript as *lcpB* coding for a WTA ligase (Figure 4A), the  
229 contribution of WTA to salt stress resistance as well as the contribution of 957 to the attachment of  
230 WTA to the cell wall was assessed. Initially the growth of a *tagO* (*tarO/llm*) mutant, a strain unable  
231 to produce WTA, was tested in LB and LB 0.5 M NaCl medium. When cells were grown in LBN, they  
232 grew normally (Supplementary Figure 5A), but under high salt conditions, the *tagO* mutant showed  
233 reduced growth, similar to that of the 957 mutant (Figure 5A). This is consistent with what has been  
234 reported previously for a *Staphylococcus epidermidis tagO* mutant [51] and indicates an important

235 role for WTA during salt stress. When the *lcpB* mutant was propagated in LBN medium, its growth  
236 was slightly inhibited (Supplementary Figure 5A). However, in high salt medium (Figure 5A) it grew  
237 unimpeded and like WT. Since the *lcpB* mutant did not show a growth defect in high salt medium,  
238 this made it unlikely that *957* is a regulator of LcpB activity. To further exclude that gene *957* could  
239 be somehow involved in the attachment of WTA to the peptidoglycan, we isolated WTA from strains  
240 grown in either LB or LB containing 0.4 M NaCl and separated the polymer on native polyacrylamide  
241 gels. The slightly lower concentration of salt was chosen because growth of the *957* and the *tagO*  
242 mutants was too strongly inhibited at 0.5 M NaCl. As expected the *tagO* mutant did not produce  
243 any WTA (Supplementary Figure 5B, Figure 5B) and consistent with previous studies [45, 46], the  
244 *lcpB* mutant exhibited slightly reduced WTA levels compared to all other strains (Supplementary  
245 Figure 5B, Figure 5B). There was no reduction of WTA observable in the *957* mutant compared to  
246 the WT strain in either LBN (Supplementary Figure 5B & 5C) or LB 0.4 M NaCl (Figure 5B & 5C) but  
247 rather a small, complementable increase, suggesting no influence of *957* over LcpB on WTA  
248 attachment.

249 Gene *957* is found upstream of the bi-functional autolysin gene *atl* and therefore we next  
250 investigated potential changes in autolytic activity using zymograms. Cell extracts from overnight  
251 cultures of the WT, the *957* mutant and the complementation strain were separated on  
252 polyacrylamide gels with embedded *Micrococcus luteus* cells and incubated overnight in buffer to  
253 re-fold the autolysins and enable the digestion of the peptidoglycan. A small increase in autolytic  
254 activity was detected in the *957* mutant (Figure 5D) for bands around 55 kDa and 70 kDa compared  
255 to the WT and complementation strain, indicating a possible change in Atl availability. We also  
256 tested the susceptibility of the *957* mutant towards the cell wall active beta-lactam antibiotic  
257 oxacillin. In contrast to our expectations, the *957* mutant exhibited a small but significant increase  
258 in MIC towards this antibiotic than the WT or the complementation strain (Figure 5E), indicating  
259 potential changes to the peptidoglycan structure. To test this, we next analyzed the muropeptide



260 profile of mutanolysin-digested peptidoglycan isolated from the WT, the 957 mutant and  
261 complementation strain after growth in LBN or LB 0.4 M NaCl medium. Upon first inspection, no  
262 peaks were absent in any condition or strain (Supplementary Figure 5D, Supplementary Figure 5E).  
263 Probing further, mono- and multimers of muropeptides up to 7-mers (see Supplementary Figure 5D  
264 for how binning was performed) were quantified but no significant changes were found when  
265 strains were cultured in LBN medium (Supplementary Figure 5F). However, when the muropeptide  
266 profiles from cells cultured in 0.4 M NaCl were compared, a significant decrease in the total amount  
267 of di- and trimers and a significant increase in higher multimers was observed for the peptidoglycan  
268 isolated from the 957 mutant (Figure 5F), suggesting that sensitivity to NaCl could potentially be  
269 caused by higher crosslinking and rigidity of the peptidoglycan in the mutant.

270 **Salt-resistant suppressors possess variations in the transglycosylase domain of Pbp2 and show**  
271 **reduced peptidoglycan crosslinking**

272 Next, we attempted to generate 957 suppressor strains that showed improved growth in the  
273 presence of 0.5 M NaCl, with the idea that by mapping and investigating the compensatory  
274 mutations, further insight into the cellular functions of protein 957 could be gained. We initially  
275 attempted to raise suppressor strains on solid medium but failed to do so, because the growth  
276 defect of the 957 mutant was not as prevalent on agar plates. We therefore used liquid medium  
277 instead, where we readily obtained suppressor strains. These strains grew as well as or even better  
278 than the WT LAC\* strain in the high salt conditions (Figure 6A) and also grew similar to the WT in  
279 LBN (Supplementary Figure 6A). The genome sequences of 10 independent suppressor strains were  
280 determined and single nucleotide polymorphisms (SNPs) in one or two genes could be identified for  
281 each strain (Supplementary table S9), except for one strain where the coverage was insufficient, and  
282 this strain was omitted from further analysis. A common denominator for all suppressor strains were  
283 SNPs in the *pbp2* gene, coding for the Penicillin binding protein 2 (Pbp2) (Figure 6B). *S. aureus* Pbp2

284 is a bifunctional enzyme [52, 53], which possesses transglycosylase and transpeptidase activity and  
285 is involved in peptidoglycan synthesis. All nine discovered SNPs were unique and led to mutations  
286 in the amino acid sequence in the transglycosylase domain but neither to stop codons, nor  
287 frameshifts nor mutations in the transpeptidase domain. The mutations were mapped (Figure 6B)  
288 onto an available Pbp2 structure (3DWK) [54] to see if a specific area of the transglycosylase domain  
289 had been targeted, but the amino acid substitutions were found throughout the molecule and not  
290 only in the active site. Interestingly, *pbp2* also appeared to be considerably less important for  
291 growth at 0.5 M NaCl (Supplementary Figure 6B and 6C), although transposons were mainly  
292 localized at the beginning and end of the gene or within the promoter region.

293 To confirm that the *pbp2* SNPs were indeed responsible for the suppression of the salt sensitivity of  
294 the 957 mutant, we transferred the *pbp2* SNPs from two strains into a fresh LAC\* $\Delta$ 957 background  
295 by co-transduction of a transposon in a nearby gene (Supplementary Figure 6D, schematic). As  
296 expected, these “recreated” suppressor strains showed also increased salt resistance (Figure 6C,  
297 Supplementary Figure 7A). In addition, we repaired the *pbp2* gene in two suppressors to the WT  
298 *pbp2* allele and this reduced their ability to cope with NaCl stress, all consistent with the hypothesis  
299 that the SNPs in *pbp2* are responsible for the suppression phenotype (Figure 6D, Supplementary  
300 Figure 7B). When the same *pbp2* SNPs were transferred into a WT LAC\* strain, a reproducible  
301 growth improvement of the SNP-bearing strains was observed in high salt medium, an indication  
302 that the *pbp2* mutations lead to a general growth improvement of *S. aureus* under NaCl stress  
303 conditions (Figure 6E, Supplementary Figure 7C).

304 Moenomycin is a phosphoglycolipid antibiotic that inhibits the transglycosylase activity of the *S.*  
305 *aureus* Pbp2 enzyme (reviewed in [55]). To test if a decrease in Pbp2 transglycosylase activity results  
306 in the improved growth of the 957 mutant in high salt conditions, cells were grown on LB agar  
307 containing 0.5 M NaCl with or without moenomycin. The growth behaviors of the WT strain and the  
308 957 mutant were similar when grown on solid LB agar containing 0.5 M NaCl but lacking

309 moenomycin (Figure 6F, top panel). As stated above, this discrepancy in the growth behavior of the  
310 957 mutant in high salt liquid versus solid medium was already noted when we attempted to  
311 generate suppressors on agar plates. On the other hand, in medium supplemented with 0.02  $\mu\text{g}/\text{ml}$   
312 moenomycin, we observed better growth of the 957 mutant compared to the WT strain (Figure 6F,  
313 lower panel). In addition, the 957 mutant also showed improved growth compared to the two  
314 suppressor strains S2 and S4 when moenomycin was added (Figure 6F, lower panel). These findings  
315 are consistent with the idea that a partial inhibition of the glycosyltransferase activity of Pbp2 can  
316 improve the growth of the 957 mutant in high salt medium.

317         Because the LAC\* $\Delta$ 957 strain showed increased peptidoglycan crosslinking when compared  
318 to a WT strain, we hypothesized that the peptidoglycan of the suppressor strains would be again  
319 less crosslinked. To test this, the peptidoglycan from two of the suppressor strains grown in LB 0.4  
320 M NaCl was isolated, the muropeptide profiles determined and compared to that of the original 957  
321 mutant (Figure 6G, Supplementary Figure 7D). As before, the muropeptide profiles looked similar  
322 (Supplementary Figure 7D) but quantification revealed a significant reduction in crosslinked  
323 peptidoglycan fragments and a significantly overrepresentation of monomeric and dimeric  
324 fragments in the suppressor strains as compared to the original 957 mutant (Figure 6G). These  
325 results indicate that the amount of crosslinking of the peptidoglycan polymer is an important factor  
326 in the salt resistance of *S. aureus* and that dysregulation of peptidoglycan crosslinking can lead to  
327 destabilizing effects.

### 328 **Different types of osmotic stresses target different sets of genes**

329 In the literature, osmotic stress is a loosely used term for any accumulation of osmolytes, however  
330 the type of ion or osmolyte can potentially have a great impact how bacteria respond. To address  
331 this issue, we then determined how the stress response between different commonly used  
332 osmolytes compare. To this end, the highly saturated *S. aureus* transposon library with the

333 promoter-less transposon was propagated for 16 generations while challenged with either 0.5 M  
334 NaCl, 0.5 M KCl or 1.0 M sucrose (Figure 7A). The molarity for sucrose was doubled, as the salts  
335 dissociate into two molecules whereas the sucrose does not. The culture challenged with 0.5 M NaCl  
336 grew the slowest, followed by 1.0 M sucrose, whereas the cells grown in 0.5 M KCl grew similarly to  
337 the cells grown in LBN (Figure 7B). Of note, the optical density measurements of *S. aureus* in 1.0 M  
338 sucrose proved to be difficult because the OD<sub>600</sub> values dropped dramatically upon diluting cells into  
339 this medium. In all likelihood, the exposure leads to shrinking of the cells and therefore reduced  
340 absorbance, resulting in values too low to detect in the first two hours.

341 As expected by using a large and good quality transposon library, transposon insertions were found  
342 under all conditions in genes throughout the whole genome (Figure 7C). Next, the number of TN-  
343 insertions per gene following growth under the NaCl, KCl or sucrose stress condition was compared  
344 to the number of TN-insertions per gene after growth in LBN medium (Supplementary table S10)  
345 and in this manner conditionally essential (Supplementary table S11) and dispensable  
346 (Supplementary table S12) genes identified. Fold-changes in transposon insertions per gene and q-  
347 values were plotted in volcano plots (Figure 7D). From this, it was evident that under KCl stress the  
348 number of essential and dispensable genes was much lower than for NaCl or sucrose stress,  
349 indicating a much less severe effect of KCl on *S. aureus* cells. Sucrose stress also showed a reduced  
350 set of essential and dispensable genes compared to NaCl stress, but considerably higher than under  
351 the KCl condition. This was also reflected when inspecting the gene lists of the top 30 essential or  
352 dispensable genes (Supplementary table S11-12) as in the KCl condition only 15 and 2 genes  
353 respectively met the requirements of q-value  $\leq 0.05$  and a fold-change of 5. To identify common  
354 genes between conditions, the fold-change stringency was relaxed to 2-fold and the overlap of  
355 genes was visualized in Venn diagrams (Figure 7E, individual genes in Supplementary Table S13).  
356 Three genes, namely SAUSA300\_0425 (USA300HOU\_0457, *mpsA* (*nuoF*), a cation transporter of the  
357 respiratory chain [56]) SAUSA300\_0750 (USA300HOU\_0796, *whiA*, a hypothetical protein, possibly

358 involved in cell wall synthesis) and SAUSA300\_0846 (USA300HOU\_0903, a possible sodium:proton  
359 antiporter) were essential in all conditions. In the case of dispensable genes, only one gene,  
360 SAUSA300\_1255 (USA300HOU\_1294, *mprF/fmtC*), coding for a phosphatidylglycerol  
361 lysyltransferase involved in the defense against cationic microbial peptides, was identified in all  
362 conditions (Figure 7E, (Supplementary Table S12). Overall, the overlaps between conditions were  
363 small, indicating distinct modes of actions for each osmotic stress.

364 Next, in order to assess similarities and differences on a gene function and cellular pathway level,  
365 functional Voronoi maps were generated from the conditionally essential (Figure 8) and dispensable  
366 (Supplementary Figure 8) genes regardless of their p-values. These images highlighted the  
367 essentiality of the wall teichoic acid through *tagO* and the *dlt* operon (Figure 8A) as reported in the  
368 first two experiments for the 0.5 M NaCl condition and the essentiality of the transporters AapA and  
369 MgtE in both NaCl (Figure 8A) and KCl (Figure 8B) stress conditions. In the high sucrose condition,  
370 these transporters were much less prominent (Figure 8C). The patterns of essential genes suggested  
371 a similar stress response for the ionic stressors NaCl and KCl that was distinct from sucrose stress.

372 When the dispensable genes were investigated (Supplementary Figure 8), the number and type of  
373 genes in the NaCl condition differed considerably from KCl and sucrose stress. Under NaCl stress  
374 (Supplementary Figure 8A), in addition to the penicillin binding protein *pbp2*, a large number of  
375 genes involved either directly in respiration or indirectly by their role in ubiquinone synthesis were  
376 found to be dispensable (Supplementary Figures 3A, 3B and 8A). The number of dispensable genes  
377 in the KCl (Supplementary Figure 8B) and sucrose (Supplementary Figure 8C) conditions were  
378 considerably less, indicating differences in the osmotic stress response between NaCl and KCl.

### 379 **Verification of KCl sensitivity of conditionally essential genes identified by TN-seq**

380 Next, from the pool of genes postulated to be essential under KCl stress, and also taking into account  
381 genes that overlapped between NaCl and KCl conditions (Figure 8A and B), mutants were selected

382 for growth analysis in medium containing 0.5 M KCl. This included strains NE736 (*SAUSA300\_0910*,  
383 *mgtE*), NE867 (*SAUSA300\_0483*, *mazG*) and NE810 (*SAUSA300\_1642*, *aapA*) (Figure 9). In addition,  
384 NE1384 (*SAUSA300\_0957*, *gene 957*) was also included. When grown in LB medium supplemented  
385 with 0.5 M KCl, all strains showed a strong growth defect compared to the WT strain JE2 (Figure 9A,  
386 LBN curves in Figure 2). The strongest growth defect was observed for the *mgtE* mutant strain  
387 NE736. This is in line with our TN-seq data, as the *mgtE* gene was identified as the top candidate of  
388 essential genes in the KCl condition (Supplementary table S11). MgtE is a putative  
389 magnesium/cobalt transporter with a cystathionine-beta-synthase (CBS) domain that is thought to  
390 regulate ion translocation [57] but not much is known in *S. aureus*. In previous studies, we  
391 determined that the CBS domain of MgtE is not a c-di-AMP target [58] and we recently  
392 demonstrated that MgtE is an important contributor to cobalt toxicity in *S. aureus* [38]. To verify the  
393 KCl sensitivity, growth curves were repeated with a clean  $\Delta mgtE$  mutant and complementation  
394 strain. In LBN medium a slight, but complementable, growth defect was detectable for the *mgtE*  
395 mutant but an almost complete growth arrest was seen in LB medium supplemented with 0.5 M KCl  
396 (Figure 9B). Taken together, we present robust data on different osmotic stresses and our results  
397 indicate that the osmotic stresses caused by NaCl, KCl and sucrose are distinct from each other.  
398 Nevertheless, some genes such as *mgtE* play an important role in more than one condition and are  
399 therefore valuable targets for upcoming studies.

## 400 Discussion

401 In this work, we successfully identified several salt tolerance genes in the USA300 *S. aureus* strain  
402 and further characterized gene 957, a gene without previously assigned function. Our results  
403 indicate that the gene product is involved in cell envelope homeostasis but likely not WTA  
404 attachment and we show that its absence leads to more crosslinked peptidoglycan. Suppressors of  
405 a 957 mutant acquired mutations in *pbp2* and the increase in peptidoglycan crosslinking was  
406 reversed in such strains. This demonstrates that the synthesis of the peptidoglycan layer is a tightly  
407 regulated process that plays an essential role during osmotic stress. In addition, we tested other  
408 osmotic stresses and performed TN-seq screens and could show that each osmotic stressor affects  
409 a defined but different set of genes. It is therefore important to use the term osmotic stress  
410 carefully, as our results highlight that there is not a general osmotic stress response but rather  
411 responses tailored to the individual osmolyte.

412 TN-seq experiments provide a wealth of information about the growth ability of single mutants in a  
413 mixed population and can therefore quickly and accurately determine genes that are required under  
414 certain growth condition. It is however always a concern that a single TN-seq experiment might not  
415 be reproducible due to stochastic extinction of individual mutants or certain growth dynamics. In  
416 this study, we performed three independent NaCl TN-seq experiments using two different libraries  
417 and slightly different experimental setups. Although there were differences between experiments,  
418 overall the data (0.5 M NaCl LB, 17 generations) proved to be rather consistent between different  
419 runs (Figure 1D) suggesting that a single experiment would be sufficient in most cases.

420 Because TN-seq relies on the selection of strains adapted to certain growth conditions, competition  
421 between mutants and subsequent depletion of the input library it is to be expected that this method  
422 is ideal for exploring the long-term effects on growth instead of quick, short-term response to  
423 stresses. To evaluate how our TN-seq results compared to previous results from high-throughput

424 studies of *S. aureus* cells grown in high salt conditions, we determined the overlaps between our 0.5  
425 M NaCl, 17 generation datasets and a microarray data set acquired from cells grown for ~6  
426 generations in 2 M NaCl [15]. To compare the datasets, the *S. aureus* strain COL locus tags used in  
427 the microarray study were first converted to TCH1516 locus tags where possible (Supplementary  
428 Table S14) and afterwards compared with the first two 0.5 M NaCl, 17 generation TN-seq datasets.  
429 The overlap between the downregulated (microarray) and dispensable (TN-seq) genes was minimal  
430 in both replicates (1 and 7) and also very small for the upregulated and essential genes (both 14).  
431 Three operons were consistently essential or upregulated between all datasets: the *cap5*,  
432 *SAUSA300\_0771-2*, and the *sda* operon. The *cap5* genes are involved in capsule production [59] and  
433 this type of capsule has been previously reported to be induced by the addition of salt [60]. Genes  
434 *SAUSA300\_0771-2* are hypothetical membrane proteins and presumably part of a threonine/serine  
435 exporter (Interpro database IDs: IPR010619 and IPR024528) and the *sda* genes are annotated as L-  
436 serine dehydratase components and a regulator protein. Taken together, the low overlap between  
437 the microarray and TN-seq data (Supplementary Table S14) further highlights that in our screen we  
438 have identified a number of previously unknown salt tolerance genes.

439 Most mutants of potential NaCl essential genes identified in the TN-seq screen proved to be  
440 sensitive to 0.5 M NaCl (Figure 2A-D), confirming the effectiveness of the TN-seq screen. In  
441 particular, previously uncharacterized genes such as *SAUSA300\_0694*, *mgtE*, and the *957* gene could  
442 be identified as essential during NaCl stress and their phenotypes could be complemented (Figure  
443 3). In our study, we opted not to experimentally validate any of the dispensable genes, as the  
444 verification of a growth advantage is more difficult to prove than a growth defect, but these genes  
445 will provide interesting starting points for future research. In addition, it will be interesting to  
446 investigate higher concentrations of NaCl to see if the same or different genes are flagged as  
447 essential and dispensable.



448 Gene 957 was selected for further characterization as part of this study, because it had previously  
449 not been linked to NaCl stress and had not been investigated before. As gene 957 and *lcpB* are co-  
450 transcribed we initially assumed that protein 957 is involved in WTA attachment via LcpB but we  
451 were unable to demonstrate such a link. Instead the 957 mutant exhibited increased muropeptide  
452 crosslinking, which could be suppressed by certain *pbp2* SNPs suggesting involvement in  
453 peptidoglycan synthesis. We can only speculate if the SNPs identified in *pbp2* increase or inhibit the  
454 activity of Pbp2. However, judging by the number of independent SNPs, it seems more likely that  
455 the mutations lead to a decrease rather than an increase in transglycosylase activity. In addition,  
456 the results from the moenomycin sensitivity experiments using a sublethal antibiotic concentration  
457 (Figure 6F) highlights that partial inactivation of the transglycosylase activity of Pbp2 improves the  
458 growth of the 957 strain in high salt conditions. This is consistent with the idea that the obtained  
459 *pbp2* SNPs lead to a decrease in transglycolylase activity. The absence of frameshift or non-sense  
460 mutations can be explained by the importance of the C-terminal transpeptidase domain of *pbp2*  
461 [61] and this is reflected in the transposon insertion distributions (Supplementary Figure 6B & C).  
462 Intriguingly, the suppressor mutants show reduced growth compared to the 957 mutant on  
463 moenomycin plates, presumably due to transglycosylation activity reduced to levels that are  
464 detrimental to the cell. At this point it is also unclear how mutations in the transglycosylase domain  
465 alter the muropeptide pattern, since the peptide bonds are made by the transpeptidase, not the  
466 transglycosylase domain. We hypothesize that a decrease in the efficiency of the glycosylation  
467 activity and slowing down the glycan chain synthesis process, will allow reduce the efficiency of the  
468 subsequent transpeptidation process, resulting in decreased peptidoglycan crosslinking in the *pbp2*  
469 SNP strains. It is also noteworthy that the *pbp2* gene becomes dispensable under NaCl conditions  
470 (Supplementary Figure 8A), an additional indicator that Pbp2 activity needs to be avoided under  
471 high salt conditions.

472 Interestingly, the 957 mutant exhibited a slightly higher oxacillin MIC than the WT. This is in contrast  
473 to what we expected as MICs are determined in 2% (0.342 M) salt medium and this should lead to  
474 a growth disadvantage of the mutant. However, when seen in light of the increase in peptidoglycan  
475 crosslinking, this could explain the growth advantage of the 957 mutant in the presence of this beta-  
476 lactam antibiotic, as this could counter the inhibition of transpeptidases by oxacillin.

477 Although we were unable to determine the exact molecular mechanism, it is clear from our data  
478 that gene 957 is involved in cell wall synthesis either directly or indirectly. More generally, our work  
479 suggests that the rigidity of the peptidoglycan cell wall is an important factor to counter osmotic  
480 stresses and it is conceivable that the more crosslinked cell wall of the 957 mutant is less elastic and  
481 therefore easier to break under strong osmotic stress caused by NaCl exposure (Summarized in  
482 Figure 10).

483 From our TN-seq data and the use of different osmotic stressors (NaCl, KCl and sucrose), it is evident  
484 that although all these compounds exert osmotic stress, the response differs greatly between them  
485 (Figure 7, Figure 8 and Supplementary Figure 8). NaCl and KCl conditions share a set of genes that  
486 become essential such as the transporters *aapA* and *mgtE* (Figure 8A and B) but differ in the set of  
487 dispensable genes (Supplementary Figure 8A and B). It is intriguing that a whole set of respiration  
488 related genes become dispensable under NaCl stress but not under KCl stress. This could indicate  
489 that respiration should be inhibited or slowed down in high NaCl conditions, possibly by interference  
490 with sodium pumps a process less likely to be inhibited by potassium ions. The set of essential genes  
491 under sucrose conditions (Figure 8C) was vastly different from that of the NaCl and KCl conditions  
492 whereas the set of sucrose dispensable genes (Supplementary Figure 8C) looked similar to the KCl  
493 set. This highlights the differences in osmotic stress adaptations and serves as a reminder that the  
494 type of stressor remains important. Therefore, although the term osmotic pressure is useful in some  
495 contexts, it often needs to be taken with a grain of salt.

496 Using our TN-seq approach, we were able to identify another important factor, the predicted  
497 magnesium transporter MgtE, as essential during KCl, as well as NaCl stress. From experiments  
498 performed in *E. coli*, it can be inferred that MgtE transports  $Mg^{2+}$  ions from the outside of the cell  
499 into the cytoplasm [57]. In our previous work, we have shown that the addition of  $Co^{2+}$  to the growth  
500 medium of a MgtE-carrying *S. aureus* strain leads to a growth defect that can be rescued by deletion  
501 of *mgtE* [38], which is in line with cation import by MgtE. Using *in vitro* assays, it was shown for the  
502 *E. coli* MgtE transporter that the addition of  $K^+$  or  $Na^+$  does not inhibit  $Mg^{2+}$  transport, which means  
503 that MgtE is unable to import sodium or potassium. This raises the question why NaCl or KCl would  
504 inhibit the growth of an *mgtE* mutant. It is possible that an abundance of KCl or NaCl in the growth  
505 medium leads to an increase in these ions in the cell envelope. This could displace magnesium ions,  
506 which are an important factor for the stability of the cell wall and a higher requirement of  
507 magnesium under NaCl stress has been demonstrated [62]. Deletion of *mgtE* presumably reduces  
508 the uptake of magnesium and could reduce magnesium levels in the cell envelope leading to a  
509 destabilization of the cell.

510 In conclusion, we have identified a number of previously uncharacterized factors involved in the  
511 osmotic stress response of *S. aureus*, which in particular highlighted the importance of the cell  
512 envelope and the data generated will provide a great resource for further studies of the  
513 staphylococcal osmotic stress response.

#### 514 **Acknowledgements**

515 This research was funded by the Wellcome Trust through grants 100289 and 210671/Z/18/Z to A.G.  
516 and the NIH grant P01AI083214 to S.W.. C.F.S. is funded by the German Research Foundation  
517 [Deutsche Forschungsgemeinschaft (DFG)] through grant SCHU 3159/1–1 and F.C.M.K. was  
518 supported by a Wellcome trust Ph.D. studentship. We thank Microbes NG and the London Institute  
519 of Medical Sciences for providing whole genome sequencing services and the Tufts sequencing

520 facility for the sequencing services for the TN-seq experiments. We also would like to thank Ute  
521 Bertsche for kind advice on HPLC analyses.

## 522 **Author contributions**

523 C.F.S., D.M.W., F.C.K. and A.G. performed the research; C.F.S., D.M.W., F.C.M.K., M.S., S.W. and A.G.  
524 analyzed the data; C.F.S. and A.G. designed the research; C.F.S. and A.G. wrote the paper. All authors  
525 approved the final version of the manuscript.

## 526 **Conflict of interests**

527 The authors declare not conflict of interest.

## 528 **Data availability**

529 The whole genome sequencing data were deposited at the European Nucleotide Archive (ENA)  
530 under accession id ERP115099 and TN-seq data in the short read archive (SRA) at the National  
531 Center for Biotechnology Information (NCBI) under BioProject ID PRJNA544248. Analyzed tables can  
532 be found in the supplementary files. For other data, please contact the corresponding author.

## 533 **Material and Methods**

### 534 **Growth of bacteria**

535 *E. coli* and *S. aureus* strains were streaked from frozen stock onto Lysogenic Broth (LB) or Tryptic  
536 Soya agar (TSA) plates, respectively. For all *E. coli* and most *S. aureus* experiments, the bacteria were  
537 grown in LB medium (LB normal, LBN, 10 g Tryptone, 5 g Yeast extract, 5 g NaCl) pH 7.5 or LB medium  
538 with extra 0.25 M, 0.5 M NaCl, 0.5 M KCl or 1 M sucrose added. For molecular cloning and some  
539 other experiments (as indicated in the text), *S. aureus* strains were grown in TSB medium. Growth

540 curves were done in 125 ml flasks with 20 ml of medium without antibiotics. Cultures were  
541 inoculated from overnight cultures to a starting OD<sub>600</sub> of 0.01 and growth was followed by  
542 determining OD<sub>600</sub> readings every one or two hours.

### 543 **TN-seq experiments**

544 A previously published highly-saturated *S. aureus* USA300 library with a mix of six different  
545 transposons was used [34, 35]. In addition, a new transposon library with only the blunt transposon,  
546 containing approximately 1.2 million individual clones, was produced using the same techniques as  
547 described in Santiago *et al.* [34].

548 In the first experiment (replicate A), a tube of the mixed library was thawed on ice and used to set  
549 up a 20 ml pre-culture in LBN/Erm 5 µg/ml with a starting OD<sub>600</sub> of 0.1. This starter culture was  
550 grown for 1 hour and subsequently used to inoculate 25 ml of either LBN, LB 0.25 M NaCl or LB 0.5  
551 M NaCl containing Erm 5 µg/ml to a starting OD<sub>600</sub> of 0.00125. When the cultures reached an OD<sub>600</sub>  
552 of approximately 1.4, bacteria from 10-12 ml culture were harvested by centrifugation (10  
553 generation sample). For, the 17 generation sample, the first cultures were back-diluted 1:100-fold  
554 into 25 ml fresh medium when they reached an OD<sub>600</sub> of 0.3 and bacteria from 10-12 ml harvested  
555 by centrifugation when the back-diluted culture reached an OD<sub>600</sub> of 1.3 to 1.6 (17 generations). The  
556 bacterial pellets were washed once with their respective growth medium and stored at -20°C for  
557 further processing. In the second experiment (replicate B), the transposon library containing only  
558 the blunt transposon was used, Erm was omitted after the pre-culture step and samples were only  
559 collected at around 16 generations. In the third experiment, the blunt library was used, Erm 10  
560 µg/ml was only added to the pre-culture, and the bacteria grown in either LBN, LB 0.5 M NaCl, LB  
561 0.5 M KCl or LB 1.0 M sucrose medium and cells collected after 16 generations.

562 The library preparation for sequencing was done as described previously [34]. Briefly, genomic DNA  
563 was isolated, cut with *NotI*, biotinylated adapters ligated, the DNA cut again with *MmeI*, and

564 fragments ligated to Illumina adapters and the products PCR amplified, incorporating bar codes and  
565 the Illumina adaptor sequences P5 and P7. The samples were sequenced on an Illumina HiSeq  
566 machine after spiking with 40% PhiX DNA. The data analysis was done using the Tufts Galaxy Server  
567 and custom python scripts as described earlier [34]. To this end, the reads were trimmed up to the  
568 barcode and de-multiplexed by strain barcode. Due to the variability in the DNA cleavage by the  
569 *MmeI* restriction enzyme, the reads that could not be mapped to a barcode were trimmed by an  
570 additional base and the process repeated. Reads were then mapped to the USA300\_TCH1516  
571 (CP000730.1) genome and a hop table was generated. Statistical analysis (Mann-Whitney tests and  
572 Benjamini-Hochberg) was done using custom python scripts [34]. Further exploration of the data  
573 was done using Excel and custom R scripts.

#### 574 ***S. aureus* cell diameter measurements**

575 For cell diameter measurements, *S. aureus* strains ANG4054, ANG4340, ANG4341 were grown  
576 overnight (14-20 hours) at 37°C with 180 rpm shaking in 5 ml LBN in the presence of 100 ng/ml Atet.  
577 100 µl of these overnight cultures was transferred to a 1.5 ml reaction tube and 1.5 µl of BODIPY-  
578 FL-vancomycin (100 µg/ml in phosphate buffered saline) was added to each tube to stain the cell  
579 wall. After a 30 min static incubation step at 37°C, 1.5 µl of the suspension was pipetted onto a slide  
580 covered with a 1% agarose pad and analyzed by microscopy using an Axio Imager.A2 microscope  
581 with an EC Plan-Neofluar 100x/1.30 Oil M27 objective and images recorded using an AxioCam MR  
582 R3. Native CZI files were opened in FIJI [63] and cell diameters of 200 cells were measured using the  
583 line and measure tool. Only cells without any visible septa were measured. Experiment was  
584 conducted five times with independent biological cultures (n=5, 200 cells each).

585 **CFU/OD correlations**

586 The different *S. aureus* strains were grown as described for the cell diameter measurements. Optical  
587 densities of cultures were measured as well as 100  $\mu$ l of  $10^{-6}$  dilutions (made in their respective  
588 growth medium) plated onto TSA plates. The next day, the number of colonies were counted and  
589 the ratios of OD<sub>600</sub> to CFU calculated. The experiment was conducted six time with independent  
590 biological samples (n=6).

591 **Zymogram assays**

592 The different *S. aureus* strains were grown over night in TSB. The next day, the bacteria from an  
593 OD<sub>600</sub> equivalent of 20 were pelleted by centrifugation for 3 min at 17000 x *g*. The cells were washed  
594 twice with 600  $\mu$ l PBS and subsequently suspended in 50  $\mu$ l SDS sample buffer. The suspension was  
595 boiled for 20 min with interspersed shaking, centrifuged for 5 min at 17000 x *g* and 20  $\mu$ l of each  
596 sample was loaded onto Zymogram gels, which where were prepared as described previously [64].  
597 Gels were stained and de-stained using methylene blue and water. The experiment was performed  
598 twice, and a representative result is shown.

599 **WTA isolation and analysis**

600 Overnight cultures of *S. aureus* strains ANG4054, ANG4340, ANG4341, ANG1575, ANG4290,  
601 ANG4748, ANG4749, ANG4759 were prepared in LBN and used to inoculate 50 ml LBN or LB 0.4 M  
602 NaCl to an OD<sub>600</sub> of 0.01. The cultures were incubated at 37°C with shaking until they reached an  
603 OD<sub>600</sub> of 5 to 6. Where appropriate, 10  $\mu$ g/ml chloramphenicol and 100 ng/ml Atet was also added  
604 to the medium. The bacteria from 20-24 ml culture were harvested by centrifugation for 10 min at  
605 7000 x *g*. The bacterial pellets were washed with 50 mM 2-(N-morpholino) ethanesulfonic acid  
606 (MES) pH 6.5 buffer and stored at -20°C until further use. Pellets were then processed and WTA

607 separated on a 20% native polyacrylamide gel by electrophoresis on a Biorad Protein XL ii cell as  
608 described previously [65] and WTA visualized by silver staining according to the manufacturer  
609 protocol. Experiments were done with three biological replicates (n=3) and a representative result  
610 is shown.

### 611 **Peptidoglycan isolation and analysis**

612 Peptidoglycan was prepared as described previously [66] with the following modifications: 0.5 L  
613 (ANG4290, ANG4382, ANG4384) or 1.0 L (ANG5054, ANG4340, ANG4341) of LB 0.4 M NaCl medium  
614 (all strains) or LBN (ANG5054, ANG4340, ANG4341) medium were inoculated to an OD<sub>600</sub> of 0.01.  
615 For strains carrying derivatives of plasmid pTET, the medium was supplemented with 100 ng/ml  
616 Atet starting from the pre-cultures. The cultures were grown at 37°C with shaking at 180 rpm until  
617 they reached an OD<sub>600</sub> of 2-3 and bacteria were subsequently harvested by centrifugation.  
618 Chromatography of mutanolysin digested peptidoglycan was performed as described previously  
619 using an Agilent 1260 infinity system [66] and muropeptide peaks assigned according to de Jonge *et*  
620 *al.* [67]. For the muropeptide quantification, a baseline was drawn, the total peak area determined  
621 as well as the peak areas for mono- and the different multimer peaks and calculated as percentage  
622 of the total peak area. The peak area quantification was done three times for each HPLC  
623 chromatogram and average values were calculated. Experiments were done with three biological  
624 replicates (n=3).

### 625 **Data analysis, software and statistics**

626 Data were processed with a combination of Python 3.6 (<https://www.python.org>), R 3.3 & 3.5  
627 (<https://www.r-project.org/>), RStudio 1.1 & 1.2 (<https://www.rstudio.com/>), Prism 7 and 8  
628 (<https://www.graphpad.com>), ChemStation OpenLab C.01.05 (<https://www.agilent.com/>) and  
629 Microsoft Excel 15 and 16 (<https://www.office.com/>). Voronoi images were drawn using



630 Proteomaps V2 [36, 37] using custom TMD files. Microscopy images were analyzed using FIJI 1.0  
631 (<https://fiji.sc/>). Statistical analysis was performed with Prism using appropriate tests as described  
632 in the figure legends.

### 633 **Raising of $\Delta 957$ suppressor strains**

634 Multiple independent overnight cultures of strain LAC\* $\Delta 957$  (ANG4290) were prepared in 5 ml LBN.  
635 These cultures were back diluted the next day into 20 ml LB 0.5 M NaCl to a starting OD<sub>600</sub> of 0.05  
636 and grown for 8-10 hours at 37°C with shaking until the cultures were slightly turbid. 50  $\mu$ l of each  
637 culture was passed into 5 ml of LBN and grown overnight. The next day, appropriate culture dilutions  
638 were plated onto LBN agar plates and incubated overnight at 37°C. For each independent culture,  
639 multiple single colonies were picked and used to inoculate individual wells of a 96-well microtiter  
640 plates containing 100  $\mu$ l LBN and the plates were subsequently incubated at 37°C in a 96-well plate  
641 incubator with shaking at 650 rpm. The next day, a culture aliquot was stored at -80°C, and the  
642 cultures were also diluted 1:50 in LB 0.5 M NaCl medium and 20  $\mu$ l of these diluted cultures used to  
643 inoculate 180  $\mu$ l of LB 0.5 M NaCl medium. The plates were incubated overnight with shaking at  
644 37°C and the next morning the growth of the potential 957 suppressor strains compared to that of  
645 the original LAC\* $\Delta 957$  deletion strain (ANG4290), which showed low growth and the WT LAC\*  
646 (ANG1575) strain, which showed good growth. For each lineage, four suppressors that showed good  
647 growth were streaked out from the previously frozen stocks and subsequently single colonies  
648 selected to set up overnight cultures. The deletion of gene *SAUSA300\_0957* was confirmed by PCR  
649 and after performing growth curves in culture flasks, one strain that showed significant growth  
650 improvement compared to the original LAC\* $\Delta 957$  (ANG4290) strain was selected from each lineage.  
651 These strains were streaked out again for single colonies and used to inoculate an overnight culture,  
652 giving rise to the independently raised suppressor strains ANG4381 through ANG4394. The

653 compensatory mutations for several of these suppressor strains were subsequently determined by  
654 whole genome sequencing.

### 655 **Transfer of *pbp2* SNPs by phage transduction**

656 In order to demonstrate that the SNPs in *pbp2* are responsible for the growth rescue of strain  
657 LAC\* $\Delta$ 957 (ANG4290), we transferred two different *pbp2* SNPs by phage transduction into the  
658 original LAC\* $\Delta$ 957 strain as well as repaired these SNPs in the suppressor strains. This was done by  
659 placing an Erm-marked transposon in proximity of the *pbp2* gene allowing at a certain frequency for  
660 the co-transduction of the Erm marker and the *pbp2* SNP. To this end, the NTML transposon mutant  
661 library strain NE789 [43] was used, which harbors a transposon insertion in *SAUSA300\_1332*  
662 (putative exonuclease) about 10 kbp upstream of the *pbp2* gene. *SAUSA300\_1332* is expected to be  
663 unrelated to salt stress and the cell wall synthesis machinery but close enough to lead to an  
664 intermediate rate of co-transference with the *pbp2* SNPs. The transposon from NE789 was  
665 transduced into WT LAC\* [68] and strain LAC\* $\Delta$ 957 (ANG4290) using phage  $\Phi$ 85 yielding strains  
666 ANG4561 and ANG452, respectively. The transposon was also transduced into the suppressor  
667 strains ANG4382 and ANG4384 transferring either *SAUSA300\_1332::Tn* only, yielding strains  
668 ANG4527 and 4528 or transferring *SAUSA300\_1332::Tn* as well as replacing the *pbp2* SNP with a WT  
669 *pbp2* allele yielding *pbp2* repaired strains ANG4557 and ANG4568. Lysates from strains ANG4527  
670 and 4528 (suppressors containing *pbp2* SNPs and *SAUSA300\_1332::Tn*) were used to transfer the  
671 *pbp2* SNPs back into a clean LAC\* $\Delta$ 957 strain background yielding strains ANG4624 and ANG4625  
672 and into WT LAC\*, yielding strains ANG4563 and ANG4564. Successful repair or transfer of the SNPs  
673 was checked by PCR and subsequent restriction digest of the product choosing enzymes that  
674 recognize sites present in either the WT or SNP allele (ANG4382 *pbp2* SNP: BsrI. Recognition site  
675 CCWGG, additional site introduced by SNP; ANG4384 *pbp2* SNP: SspI. Recognition site: AATATT, site  
676 missing in SNP).

## 677 **Determination of oxacillin MICs using Etest strips**

678 *S. aureus* strains LAC\* piTET (ANG4054), LAC\*Δ957 piTET (ANG4340) and the complementation  
679 strain LAC\*Δ957 piTET-957 (ANG4341) were grown overnight (22 hours) in 5 ml TSB containing 10  
680 μg/ml chloramphenicol and 100 ng/ml Atet. The next day, the cultures were diluted to an OD<sub>600</sub> of  
681 0.1 in sterile PBS buffer and streaked with cotton swabs onto cation adjusted Mueller-Hinton agar  
682 plates supplemented with 2% NaCl and 100 ng/ml Atet. One M.I.C.Evaluator strip was placed on  
683 each plate and the plates were incubated for 24 hours at 35°C. MICs were then read directly from  
684 the strips. The experiment was done with 4 biological replicates (n=4).

## 685 **Moenomycin growth improvement test**

686 *S. aureus* strains LAC\* (ANG1575), LAC\* Δ957 (ANG4290), LAC\* Δ957 S2 (ANG4382) and LAC\* Δ957  
687 S4 (ANG4384) were grown overnight (18 hours) in 5 ml LBN. The next day, the cells were diluted to  
688 an OD<sub>600</sub> of 0.01 in LBN, grown until mid-exponential phase (OD<sub>600</sub> 0.4-0.6) and normalized to an  
689 OD<sub>600</sub> of 0.1. The cells were 10-fold serially diluted and 5 μl of each dilution spotted onto LB agar  
690 containing 0.5 M NaCl with either 0.02 μg/ml moenomycin (mix of moenomycin A, A12, C1, C3 and  
691 C4, Santa Cruz Biotechnology) or no moenomycin. Plates were incubated at 37°C overnight (18-22  
692 hours) and photographed. The experiment was done with 3 biological replicates (n=3) and one  
693 representative result is shown.

## 694 **Whole genome sequencing**

695 Genomic DNA was either isolated using the Promega Gene Wizard kit according to the manufacturer  
696 instructions or using chloroform-isoamylalcohol as described previously [69]. DNA was sent off for  
697 whole genome sequencing to MicrobesNG, Birmingham, U.K. or libraries prepared using the  
698 Illumina Nextera DNA kit and sequenced at the London Institute of Medical Sciences. Short reads

699 were trimmed in CLC workbench genomics (Qiagen), then mapped to a custom *S. aureus* USA300  
700 LAC\* reference genome generated in a previous study [70] and single nucleotide polymorphisms  
701 called based on at least 80% frequency of occurrence. This list was compared to a manually curated  
702 list of well non false-positives and these entries were removed.

### 703 **Nebraska Transposon Mutant Library (NTML) strains and complementation strains**

704 All Nebraska transposon mutant library (NTML) strains and primers used in this study are listed in  
705 supplementary tables S8, S15 and S16. Transposon insertions in the respective genes were  
706 confirmed by PCRs. For complementation analysis, NTML strains NE535 (JE2 *SAUSA300\_0867::Tn*),  
707 NE867 (JE2 *SAUSA300\_0483::Tn*) were transformed as controls with the empty plasmid pCL55 [71],  
708 yielding strains ANG4326 and ANG4328 and strains NE188 (JE2 *SAUSA300\_0481::Tn*), NE251 (JE2  
709 *SAUSA300\_0482::Tn*), NE526 (JE2 *SAUSA300\_0694::Tn*), NE736 (JE2 *SAUSA300\_0910::Tn*), NE1384  
710 (JE2 *SAUSA300\_0957::Tn*) with plasmid piTET [72], yielding ANG4308, ANG4310, ANG4377,  
711 ANG4336, ANG4338. The WT strain JE2 [43] was also transformed with both plasmids yielding JE2  
712 pCL55 (ANG4325) and JE2 piTET (ANG4307).

713 The complementation plasmid piTET-481 for strain NE188 (JE2 *SAUSA300\_0481::Tn*) was  
714 constructed by amplifying the *SAUSA300\_0481* gene using primers P2378/P2379, digesting the  
715 product with AvrII/BglII and ligating the fragment with plasmid piTET cut with the same enzymes.  
716 The plasmid was then introduced into *E. coli* strain XL1-Blue, yielding ANG4139. After shuttling the  
717 plasmid through *E. coli* strain IM08B [73], creating strain ANG4150, the plasmid was integrated into  
718 the *geh* locus of NE188 (JE2 *SAUSA300\_0481::Tn*) yielding strain ANG4309. The complementation  
719 plasmid piTET-482 for strain NE251 (JE2 *SAUSA300\_0482::Tn*), piTET-694 for strain NE526 (JE2  
720 *SAUSA300\_0694::Tn*), piTET-910 for strain NE736 (JE2 *SAUSA300\_0910::Tn*), and piTET-957 for  
721 strain NE1384 (JE2 *SAUSA300\_0957::Tn*) were constructed in a similar manner using primer pairs  
722 P2380/P2381 (*SAUSA300\_0482*), P2388/P2389 (*SAUSA300\_0694*), P2384/P2385 (*SAUSA300\_0910*)

723 and P2386/P2387 (*SAUSA300\_0957*), respectively. The complementation plasmids were recovered  
724 in *E. coli* XL1-Blue yielding strains ANG4140 (*SAUSA300\_0482*), ANG4142 (*SAUSA300\_0694*),  
725 ANG4144 (*SAUSA300\_0910*) and ANG4145 (*SAUSA300\_0957*), shuttled through *E. coli* IM08B giving  
726 strains ANG4151 (*SAUSA300\_0482*), ANG4153 (*SAUSA300\_0694*), ANG4155 (*SAUSA300\_0910*) and  
727 ANG4156 (*SAUSA300\_0957*) and finally introduced in the respective NTML strain yielding the  
728 complementation strains ANG4311 (*SAUSA300\_0482*), ANG4378 (*SAUSA300\_0694*), ANG4337  
729 (*SAUSA300\_0910*) and ANG4339 (*SAUSA300\_0957*).

730 Complementation plasmid pCL55-483 for strain NE867 (JE2 *SAUSA300\_0483::Tn*) was made by  
731 fusing PCR products of the operon promoter (in front of *SAUSA300\_0481*) amplified with primers  
732 P2588/P2553 and the *SAUSA300\_0483* gene, amplified with primers P2554/P2589 together using  
733 primers P2588/P2589. The resulting fragment was cloned into pCL55 using EcoRI/BamHI restriction  
734 sites. The plasmid was recovered in XL1-Blue, creating strain ANG4291, shuttled through *E. coli*  
735 IM08B (ANG4292) and subsequently introduced into NE867 (JE2 *SAUSA300\_0483::Tn*) to create  
736 strain ANG4327. The complementation plasmid pCL55-867 for strain NE535 (JE2  
737 *SAUSA300\_0867::Tn*) was constructed in a similar manner, using primers P2590/P2556 and  
738 P2557/P2591 to amplify the promoter and *SAUSA300\_0867* gene, which were subsequently fused  
739 in a second PCR using primers P2590/P2591. The resulting fragment was cloning into pCL55 using  
740 EcoRI/BamHI restriction sites and the resulting plasmid recovered in *E. coli* XL1-Blue (ANG4293),  
741 shuttling through IM08B (ANG4294) and finally introduced into NE535 (JE2 *SAUSA300\_0867::Tn*),  
742 creating the complementation strain ANG4329.

#### 743 **Construction of *S. aureus* gene deletion and complementation strains**

744 *S. aureus* strains with in-frame gene deletions were constructed by allelic exchange using plasmids  
745 pIMAY [73] and pIMAY\* [38]. The gene deletion plasmids were designed to contain approximately

746 1000 bp up- and downstream regions around the deletion site, amplified from LAC\* genomic DNA  
747 [68], and the first and last 30 bp of the open reading frame to be deleted.

748 For construction of plasmid pIMAY- $\Delta$ 957, the up- and downstream regions of SAUSA300\_0957 were  
749 amplified using primers P2370/P2371 and P2372/P2373, spliced together in a second PCR using  
750 primers P2370/P2373 and cloned into pIMAY using XmaI/EcoRI. Plasmid pIMAY- $\Delta$ 957 was recovered  
751 in *E. coli* XL1-Blue, creating strain ANG4147, shuttled through *E. coli* IM08B (ANG4159) and  
752 subsequently introduced into *S. aureus* LAC\* $\Delta$ 957. The allelic exchange to delete SAUSA300\_0957  
753 and to create strain LAC\* $\Delta$ 957 (ANG4290) was performed as previously described [73]. For  
754 complementation analysis, the above described plasmid piTET-957 was integrated into the  
755 chromosome of strain LAC\* $\Delta$ 957, giving rise to the complementation strain LAC\* $\Delta$ 957 piTET-957  
756 (ANG4341). As control, the empty plasmid piTET from ANG4163 was also integrated into the  
757 chromosome of LAC\* $\Delta$ 957 yielding strain LAC\* $\Delta$ 957 piTET (ANG4340). The *lcpB* (SAUSA300\_0958)  
758 gene was deleted in a similar manner using primers P2844/P2845 and P2846/P2847 for the first and  
759 primers P2844/P2847 for the second PCR and cloning the fragment XmaI/EcoRI into pIMAY. Plasmid  
760 pIMAY- $\Delta$ *lcpB* was recovered in *E. coli* XL1blue (ANG4740), shuttled through *E. coli* IM08B (ANG4742)  
761 and introduced into the *S. aureus* LAC\* (ANG4744) and finally yielding the *lcpB* deletion strain  
762 LAC\* $\Delta$ *lcpB* (ANG4748).

763 Plasmid pIMAY\*- $\Delta$ 957-958 was constructed for the production of an SAUSA300\_0957-0958 (*lcpB*)  
764 double mutant strain in which the first 30 bases of SAUSA300\_0957 are fused to the last 30 bp of  
765 SAUSA300\_0958 (*lcpB*). This was done using primers P2844/P2848 and P2849/P2373 in the first and  
766 primers P2844/P2373 in a second PCR. The fragment was cloned using XmaI/EcoRI into pIMAY\* [38]  
767 and the resulting plasmid pIMAY\*- $\Delta$ 957-958 recovered in *E. coli* XL1-Blue (ANG4741). The plasmid  
768 was shuttled through *E. coli* IM08B (ANG4743), introduced into *S. aureus* LAC\* (ANG4745) and  
769 following the allelic exchange procedure yielding the *S. aureus* strain LAC\* $\Delta$ 957-958 (*lcpB*)  
770 (ANG4749).

771 The plasmid pIMAY- $\Delta$ *mgtE* was designed to contain up- and downstream regions of  
772 SAUSA300\_0910 (*mgtE*) fused together by the first and last 30 bp of the gene in order to create a  
773 LAC\* $\Delta$ *mgtE* mutant. For this, primer pairs P2374/P2375 and P2376/P2377 were used to amplify up-  
774 and downstream regions and subsequently spliced together by PCR using primers P2374/P2377.  
775 The PCR fragment was digested with XmaI/EcoRI and ligated into pIMAY cut with the same enzymes.  
776 The plasmid pIMAY- $\Delta$ *mgtE* was recovered in *E. coli* XL1-Blue yielding strain ANG4146 and shuttled  
777 through *E. coli* IM08B yielding strain ANG4158. The plasmid pIMAY- $\Delta$ *mgtE* was then introduced into  
778 LAC\* yielding strain LAC\* $\Delta$ SAUSA300\_0910 (*mgtE*) (ANG4422) after the knockout procedure. To  
779 create an empty vector-containing control strain and a plasmid-based complementation strain, the  
780 plasmid piTET and piTET-910 from strains ANG4163 and ANG4155 were isolated and used to  
781 transform strain LAC\* $\Delta$ SAUSA300\_0910 (*mgtE*) (ANG4422), yielding strains ANG4445 (LAC\* $\Delta$ *mgtE*  
782 piTET) and ANG4446 (LAC\* $\Delta$ *mgtE* piTET-*mgtE*).

783 The *tagO* gene (SAUSA300\_0731) was inactivated using the targetron intron homing system [74] or  
784 by allelic exchange using pIMAY\* [38]. For the targetron mutagenesis, plasmid pNL9164-*tagO* was  
785 produced by amplifying the upstream targetron fragment with primers P2887 and the EBS universal  
786 primer (P2890) and the downstream fragment using primers P2888/P2889, the fragments were  
787 fused using the IBS primer (P2887) and the EBS1d primer (P2888). The final fragment was cloned  
788 using HindIII/BsrGI into pNL9164 [74]. Plasmid pNL9164-*tagO* was recovered in *E. coli* XL1-Blue,  
789 yielding strain ANG4703, introduced into *E. coli* IM08B to give rise to strain ANG4704 and finally  
790 introduced into *S. aureus* LAC\* [68] to create strain LAC\* pNL9164-*tagO* (ANG4751). The final *tagO*  
791 targetron mutant strain LAC\**tagO*::targetron (ANG4753) was generated using the method  
792 described by Yao *et al.* [74]. For the construction of *S. aureus* strain LAC\* $\Delta$ *tagO* with an in-frame  
793 deletion in *tagO*, the allelic exchange plasmid pIMAY\*- $\Delta$ *tagO* was used. To this end, up- and  
794 downstream *tagO* fragments were produced using primer pairs P2883/P2884 and P2885/P2886 and  
795 introduced by Gibson cloning into XmaI/EcoRI pre-cut pIMAY\*. Plasmid pIMAY\*- $\Delta$ *tagO* was



796 recovered in *E. coli* XL1-Blue, generating strain ANG4755. After shuttling through *E. coli* strain IM08B  
797 (ANG4756), the plasmid was introduced into *S. aureus* LAC\* to create strain ANG4757. Finally, the  
798 *tagO* locus was deleted by allelic exchange, generating strain LAC\* $\Delta$ *tagO* (ANG4759). Because initial  
799 generation of the mutant failed, cells were plated unselectively onto TSA plates and incubated at  
800 room temperature (18-25°C) for about two weeks to enable colony differentiation between WT and  
801  $\Delta$ *tagO* mutant strains. Upon prolonged incubation, *tagO* mutant strain colonies have an opaque  
802 appearance.

803

## 804 **References**

- 805 1. Wertheim HF, Melles DC, Vos MC, van Leeuwen W, van Belkum A, Verbrugh HA, et al. The  
806 role of nasal carriage in *Staphylococcus aureus* infections. *Lancet Infect Dis.* 2005;5(12):751-62. Epub  
807 2005/11/29. doi: 10.1016/S1473-3099(05)70295-4. PubMed PMID: 16310147.
- 808 2. Tong SY, Davis JS, Eichenberger E, Holland TL, Fowler VG, Jr. *Staphylococcus aureus*  
809 infections: epidemiology, pathophysiology, clinical manifestations, and management. *Clin Microbiol*  
810 *Rev.* 2015;28(3):603-61. Epub 2015/05/29. doi: 10.1128/CMR.00134-14. PubMed PMID: 26016486;  
811 PubMed Central PMCID: PMC4451395.
- 812 3. Measures JC. Role of amino acids in osmoregulation of non-halophilic bacteria. *Nature.*  
813 1975;257(5525):398-400. Epub 1975/10/02. PubMed PMID: 241020.
- 814 4. Adams MR, Moss MO. 7.14.2 The Organism and its Characteristics. *Food Microbiology* (3rd  
815 Edition): Royal Society of Chemistry; 2008.
- 816 5. Csonka LN. Physiological and genetic responses of bacteria to osmotic stress. *Microbiol Rev.*  
817 1989;53(1):121-47. Epub 1989/03/01. PubMed PMID: 2651863; PubMed Central PMCID:  
818 PMC372720.



- 819 6. Csonka LN, Hanson AD. Prokaryotic osmoregulation: genetics and physiology. *Annu Rev*  
820 *Microbiol.* 1991;45:569-606. Epub 1991/01/01. doi: 10.1146/annurev.mi.45.100191.003033.  
821 PubMed PMID: 1741624.
- 822 7. Sleator RD, Hill C. Bacterial osmoadaptation: the role of osmolytes in bacterial stress and  
823 virulence. *FEMS Microbiol Rev.* 2002;26(1):49-71. Epub 2002/05/15. doi: 10.1111/j.1574-  
824 6976.2002.tb00598.x. PubMed PMID: 12007642.
- 825 8. Graham JE, Wilkinson BJ. *Staphylococcus aureus* osmoregulation: roles for choline, glycine  
826 betaine, proline, and taurine. *J Bacteriol.* 1992;174(8):2711-6. Epub 1992/04/01. PubMed PMID:  
827 1556089; PubMed Central PMCID: PMCPMC205912.
- 828 9. Christian JH, Waltho JA. The Composition of *Staphylococcus aureus* in Relation to the Water  
829 Activity of the Growth Medium. *J Gen Microbiol.* 1964;35:205-13. Epub 1964/05/01. doi:  
830 10.1099/00221287-35-2-205. PubMed PMID: 14179669.
- 831 10. Miller KJ, Zelt SC, Bae J-H. Glycine betaine and proline are the principal compatible solutes  
832 of *Staphylococcus aureus*. *Current Microbiology.* 1991;23(3):131-7. doi: 10.1007/bf02091971.
- 833 11. Townsend DE, Wilkinson BJ. Proline transport in *Staphylococcus aureus*: a high-affinity  
834 system and a low-affinity system involved in osmoregulation. *J Bacteriol.* 1992;174(8):2702-10. Epub  
835 1992/04/01. PubMed PMID: 1556088; PubMed Central PMCID: PMCPMC205911.
- 836 12. Anderson CB, Witter LD. Glutamine and proline accumulation by *Staphylococcus aureus* with  
837 reduction in water activity. *Appl Environ Microbiol.* 1982;43(6):1501-3. Epub 1982/06/01. PubMed  
838 PMID: 7103493; PubMed Central PMCID: PMCPMC244260.
- 839 13. Bae JH, Miller KJ. Identification of two proline transport systems in *Staphylococcus aureus*  
840 and their possible roles in osmoregulation. *Appl Environ Microbiol.* 1992;58(2):471-5. Epub  
841 1992/02/01. PubMed PMID: 1610171; PubMed Central PMCID: PMCPMC195271.

- 842 14. Pourkomialian B, Booth IR. Glycine betaine transport by *Staphylococcus aureus*: evidence for  
843 feedback regulation of the activity of the two transport systems. *Microbiology*. 1992;140 ( Pt  
844 11):3131-8. Epub 1994/11/01. doi: 10.1099/13500872-140-11-3131. PubMed PMID: 7812452.
- 845 15. Price-Whelan A, Poon CK, Benson MA, Eidem TT, Roux CM, Boyd JM, et al. Transcriptional  
846 profiling of *Staphylococcus aureus* during growth in 2 M NaCl leads to clarification of physiological  
847 roles for Kdp and Ktr K<sup>+</sup> uptake systems. *MBio*. 2013;4(4). Epub 2013/08/22. doi:  
848 10.1128/mBio.00407-13. PubMed PMID: 23963175; PubMed Central PMCID: PMC3747578.
- 849 16. Scybert S, Pechous R, Sitthisak S, Nadakavukaren MJ, Wilkinson BJ, Jayaswal RK. NaCl-  
850 sensitive mutant of *Staphylococcus aureus* has a Tn917-lacZ insertion in its ars operon. *FEMS*  
851 *Microbiol Lett*. 2003;222(2):171-6. Epub 2003/05/29. doi: 10.1016/S0378-1097(03)00312-4.  
852 PubMed PMID: 12770703.
- 853 17. Schwan WR, Lehmann L, McCormick J. Transcriptional activation of the *Staphylococcus*  
854 *aureus* putP gene by low-proline-high osmotic conditions and during infection of murine and human  
855 tissues. *Infect Immun*. 2006;74(1):399-409. Epub 2005/12/22. doi: 10.1128/IAI.74.1.399-409.2006.  
856 PubMed PMID: 16368996; PubMed Central PMCID: PMC1346636.
- 857 18. Vijaranakul U, Xiong A, Lockwood K, Jayaswal RK. Cloning and nucleotide sequencing of a  
858 *Staphylococcus aureus* gene encoding a branched-chain-amino-acid transporter. *Appl Environ*  
859 *Microbiol*. 1998;64(2):763-7. Epub 1998/02/17. PubMed PMID: 9464420; PubMed Central PMCID:  
860 PMC106115.
- 861 19. Wengender PA, Miller KJ. Identification of a PutP proline permease gene homolog from  
862 *Staphylococcus aureus* by expression cloning of the high-affinity proline transport system in  
863 *Escherichia coli*. *Appl Environ Microbiol*. 1995;61(1):252-9. Epub 1995/01/01. PubMed PMID:  
864 7887605; PubMed Central PMCID: PMC167280.
- 865 20. Wetzal KJ, Bjorge D, Schwan WR. Mutational and transcriptional analyses of the  
866 *Staphylococcus aureus* low-affinity proline transporter OpuD during *in vitro* growth and infection of

- 867 murine tissues. FEMS Immunol Med Microbiol. 2011;61(3):346-55. Epub 2011/01/15. doi:  
868 10.1111/j.1574-695X.2011.00781.x. PubMed PMID: 21231964; PubMed Central PMCID:  
869 PMCPMC3055929.
- 870 21. Zeden MS, Schuster CF, Bowman L, Zhong Q, Williams HD, Gründling A. Cyclic di-adenosine  
871 monophosphate (c-di-AMP) is required for osmotic regulation in *Staphylococcus aureus* but  
872 dispensable for viability in anaerobic conditions. J Biol Chem. 2018;293(9):3180-200. Epub  
873 2018/01/13. doi: 10.1074/jbc.M117.818716. PubMed PMID: 29326168; PubMed Central PMCID:  
874 PMCPMC5836111.
- 875 22. Vijaranakul U, Nadakavukaren MJ, de Jonge BL, Wilkinson BJ, Jayaswal RK. Increased cell size  
876 and shortened peptidoglycan interpeptide bridge of NaCl-stressed *Staphylococcus aureus* and their  
877 reversal by glycine betaine. J Bacteriol. 1995;177(17):5116-21. Epub 1995/09/01. PubMed PMID:  
878 7665491; PubMed Central PMCID: PMCPMC177291.
- 879 23. Onyango LA, Hugh Dunstan R, Roberts TK, Macdonald MM, Gottfries J. Phenotypic variants  
880 of staphylococci and their underlying population distributions following exposure to stress. PLoS  
881 One. 2013;8(10):e77614. Epub 2013/11/10. doi: 10.1371/journal.pone.0077614. PubMed PMID:  
882 24204894; PubMed Central PMCID: PMCPMC3799968.
- 883 24. Vollmer W, Blanot D, de Pedro MA. Peptidoglycan structure and architecture. FEMS  
884 Microbiol Rev. 2008;32(2):149-67. Epub 2008/01/16. doi: 10.1111/j.1574-6976.2007.00094.x.  
885 PubMed PMID: 18194336.
- 886 25. Madiraju MV, Brunner DP, Wilkinson BJ. Effects of temperature, NaCl, and methicillin on  
887 penicillin-binding proteins, growth, peptidoglycan synthesis, and autolysis in methicillin-resistant  
888 *Staphylococcus aureus*. Antimicrob Agents Chemother. 1987;31(11):1727-33. Epub 1987/11/01.  
889 PubMed PMID: 3435121; PubMed Central PMCID: PMCPMC175029.
- 890 26. Stapleton MR, Horsburgh MJ, Hayhurst EJ, Wright L, Jonsson IM, Tarkowski A, et al.  
891 Characterization of IsaA and SceD, two putative lytic transglycosylases of *Staphylococcus aureus*. J

- 892 Bacteriol. 2007;189(20):7316-25. Epub 2007/08/07. doi: 10.1128/JB.00734-07. PubMed PMID:  
893 17675373; PubMed Central PMCID: PMCPMC2168438.
- 894 27. Ochiai T. *Staphylococcus aureus* produces autolysin-susceptible cell walls during growth in a  
895 high-NaCl and low-Ca<sup>2+</sup> concentration medium. Microbiol Immunol. 2000;44(2):97-104. Epub  
896 2000/05/10. PubMed PMID: 10803496.
- 897 28. Koprivnjak T, Mlakar V, Swanson L, Fournier B, Peschel A, Weiss JP. Cation-induced  
898 transcriptional regulation of the *dlt* operon of *Staphylococcus aureus*. J Bacteriol.  
899 2006;188(10):3622-30. Epub 2006/05/05. doi: 10.1128/JB.188.10.3622-3630.2006. PubMed PMID:  
900 16672616; PubMed Central PMCID: PMCPMC1482844.
- 901 29. Mistretta N, Brossaud M, Telles F, Sanchez V, Talaga P, Rokbi B. Glycosylation of  
902 *Staphylococcus aureus* cell wall teichoic acid is influenced by environmental conditions. Sci Rep.  
903 2019;9(1):3212. Epub 2019/03/03. doi: 10.1038/s41598-019-39929-1. PubMed PMID: 30824758;  
904 PubMed Central PMCID: PMCPMC6397182.
- 905 30. Kho K, Meredith TC. Salt-Induced Stress Stimulates a Lipoteichoic Acid-Specific Three-  
906 Component Glycosylation System in *Staphylococcus aureus*. J Bacteriol. 2018;200(12). Epub  
907 2018/04/11. doi: 10.1128/JB.00017-18. PubMed PMID: 29632092; PubMed Central PMCID:  
908 PMCPMC5971477.
- 909 31. Stewart CM, Cole MB, Legan JD, Slade L, Schaffner DW. Solute-specific effects of osmotic  
910 stress on *Staphylococcus aureus*. J Appl Microbiol. 2005;98(1):193-202. Epub 2004/12/22. doi:  
911 10.1111/j.1365-2672.2004.02445.x. PubMed PMID: 15610432.
- 912 32. Stewart CM, Cole MB, Legan JD, Slade L, Vandeven MH, Schaffner DW. *Staphylococcus*  
913 *aureus* growth boundaries: moving towards mechanistic predictive models based on solute-specific  
914 effects. Appl Environ Microbiol. 2002;68(4):1864-71. Epub 2002/03/28. doi:  
915 10.1128/aem.68.4.1864-1871.2002. PubMed PMID: 11916706; PubMed Central PMCID:  
916 PMCPMC123857.

- 917 33. Mitchell P, Moyle J. Permeability of the envelopes of *Staphylococcus aureus* to some salts,  
918 amino acids, and non-electrolytes. J Gen Microbiol. 1959;20(2):434-41. Epub 1959/04/01. doi:  
919 10.1099/00221287-20-2-434. PubMed PMID: 13654736.
- 920 34. Santiago M, Matano LM, Moussa SH, Gilmore MS, Walker S, Meredith TC. A new platform  
921 for ultra-high density *Staphylococcus aureus* transposon libraries. BMC Genomics. 2015;16:252. doi:  
922 10.1186/s12864-015-1361-3. PubMed PMID: 25888466; PubMed Central PMCID:  
923 PMC4389836.
- 924 35. Coe KA, Lee W, Komazin-Meredith G, Meredith TC, Grad YH, Walker S. Comparative Tn-Seq  
925 reveals common daptomycin resistance determinants in *Staphylococcus aureus* despite strain-  
926 dependent differences in essentiality of shared cell envelope genes. bioRxiv. 2019:648246. doi:  
927 10.1101/648246.
- 928 36. Liebermeister W, Noor E, Flamholz A, Davidi D, Bernhardt J, Milo R. Visual account of protein  
929 investment in cellular functions. Proc Natl Acad Sci U S A. 2014;111(23):8488-93. Epub 2014/06/04.  
930 doi: 10.1073/pnas.1314810111. PubMed PMID: 24889604; PubMed Central PMCID:  
931 PMC4060655.
- 932 37. Otto A, Bernhardt J, Meyer H, Schaffer M, Herbst FA, Siebourg J, et al. Systems-wide  
933 temporal proteomic profiling in glucose-starved *Bacillus subtilis*. Nat Commun. 2010;1:137. Epub  
934 2011/01/27. doi: 10.1038/ncomms1137. PubMed PMID: 21266987; PubMed Central PMCID:  
935 PMC3105300.
- 936 38. Schuster CF, Howard SA, Gründling A. Use of the counter selectable marker PheS\* for  
937 genome engineering in *Staphylococcus aureus*. Microbiology. 2019. Epub 2019/04/04. doi:  
938 10.1099/mic.0.000791. PubMed PMID: 30942689.
- 939 39. Ishibashi M, Kurokawa K, Nishida S, Ueno K, Matsuo M, Sekimizu K. Isolation of temperature-  
940 sensitive mutations in *murC* of *Staphylococcus aureus*. FEMS Microbiology Letters. 2007;274(2):204-  
941 9. doi: 10.1111/j.1574-6968.2007.00829.x.

- 942 40. Mlynek KD, Callahan MT, Shimkevitch AV, Farmer JT, Endres JL, Marchand M, et al. Effects  
943 of Low-Dose Amoxicillin on *Staphylococcus aureus* USA300 Biofilms. *Antimicrob Agents Chemother.*  
944 2016;60(5):2639-51. Epub 2016/02/10. doi: 10.1128/AAC.02070-15. PubMed PMID: 26856828;  
945 PubMed Central PMCID: PMC4862544.
- 946 41. Brown S, Santa Maria JP, Jr., Walker S. Wall teichoic acids of gram-positive bacteria. *Annu*  
947 *Rev Microbiol.* 2013;67:313-36. doi: 10.1146/annurev-micro-092412-155620. PubMed PMID:  
948 24024634; PubMed Central PMCID: PMC3883102.
- 949 42. Vaish M, Price-Whelan A, Reyes-Robles T, Liu J, Jereen A, Christie S, et al. Roles of  
950 *Staphylococcus aureus* Mnh1 and Mnh2 Antiporters in Salt Tolerance, Alkali Tolerance, and  
951 Pathogenesis. *J Bacteriol.* 2018;200(5). Epub 2017/12/22. doi: 10.1128/JB.00611-17. PubMed PMID:  
952 29263099; PubMed Central PMCID: PMC5809693.
- 953 43. Fey PD, Endres JL, Yajjala VK, Widhelm TJ, Boissy RJ, Bose JL, et al. A genetic resource for  
954 rapid and comprehensive phenotype screening of nonessential *Staphylococcus aureus* genes. *MBio.*  
955 2013;4(1):e00537-12. doi: 10.1128/mBio.00537-12. PubMed PMID: 23404398; PubMed Central  
956 PMCID: PMC3573662.
- 957 44. Mäder U, Nicolas P, Depke M, Pané-Farré J, Debarbouille M, van der Kooi-Pol MM, et al.  
958 *Staphylococcus aureus* Transcriptome Architecture: From Laboratory to Infection-Mimicking  
959 Conditions. *PLoS Genet.* 2016;12(4):e1005962. Epub 2016/04/02. doi:  
960 10.1371/journal.pgen.1005962. PubMed PMID: 27035918; PubMed Central PMCID:  
961 PMC4818034.
- 962 45. Chan YG, Frankel MB, Dengler V, Schneewind O, Missiakas D. *Staphylococcus aureus* mutants  
963 lacking the LytR-CpsA-Psr family of enzymes release cell wall teichoic acids into the extracellular  
964 medium. *J Bacteriol.* 2013;195(20):4650-9. doi: 10.1128/JB.00544-13. PubMed PMID: 23935043;  
965 PubMed Central PMCID: PMC3807444.

- 966 46. Over B, Heusser R, McCallum N, Schulthess B, Kupferschmied P, Gaiani JM, et al. LytR-CpsA-  
967 Psr proteins in *Staphylococcus aureus* display partial functional redundancy and the deletion of all  
968 three severely impairs septum placement and cell separation. FEMS Microbiol Lett.  
969 2011;320(2):142-51. doi: 10.1111/j.1574-6968.2011.02303.x. PubMed PMID: 21554381.
- 970 47. Schaefer K, Matano LM, Qiao Y, Kahne D, Walker S. In vitro reconstitution demonstrates the  
971 cell wall ligase activity of LCP proteins. Nat Chem Biol. 2017;13(4):396-401. Epub 2017/02/07. doi:  
972 10.1038/nchembio.2302. PubMed PMID: 28166208; PubMed Central PMCID: PMC5362317.
- 973 48. Rahman MM, Hunter HN, Prova S, Verma V, Qamar A, Golemi-Kotra D. The *Staphylococcus*  
974 *aureus* Methicillin Resistance Factor FmtA Is a d-Amino Esterase That Acts on Teichoic Acids. MBio.  
975 2016;7(1):e02070-15. Epub 2016/02/11. doi: 10.1128/mBio.02070-15. PubMed PMID: 26861022;  
976 PubMed Central PMCID: PMC4752606.
- 977 49. Berger-Bächi B, Barberis-Maino L, Strässle A, Kayser FH. FemA, a host-mediated factor  
978 essential for methicillin resistance in *Staphylococcus aureus*: molecular cloning and characterization.  
979 Mol Gen Genet. 1989;219(1-2):263-9. PubMed PMID: 2559314.
- 980 50. Oshida T, Sugai M, Komatsuzawa H, Hong YM, Suginaka H, Tomasz A. A *Staphylococcus*  
981 *aureus* autolysin that has an N-acetylmuramoyl-L-alanine amidase domain and an endo-beta-N-  
982 acetylglucosaminidase domain: cloning, sequence analysis, and characterization. Proc Natl Acad Sci  
983 U S A. 1995;92(1):285-9. PubMed PMID: 7816834; PubMed Central PMCID: PMC42863.
- 984 51. Holland LM, Conlon B, O'Gara JP. Mutation of *tagO* reveals an essential role for wall teichoic  
985 acids in *Staphylococcus epidermidis* biofilm development. Microbiology. 2011;157(Pt 2):408-18.  
986 Epub 2010/11/06. doi: 10.1099/mic.0.042234-0. PubMed PMID: 21051486.
- 987 52. Wyke AW. Isolation of five penicillin-binding proteins from *Staphylococcus aureus*. FEMS  
988 Microbiology Letters. 1984;22(2):133-8. doi: doi:10.1111/j.1574-6968.1984.tb00711.x.
- 989 53. Murakami K, Fujimura T, Doi M. Nucleotide sequence of the structural gene for the penicillin-  
990 binding protein 2 of *Staphylococcus aureus* and the presence of a homologous gene in other

- 991 staphylococci. FEMS Microbiol Lett. 1994;117(2):131-6. doi: 10.1111/j.1574-6968.1994.tb06754.x.  
992 PubMed PMID: 8181715.
- 993 54. Lovering AL, De Castro L, Strynadka NC. Identification of dynamic structural motifs involved  
994 in peptidoglycan glycosyltransfer. J Mol Biol. 2008;383(1):167-77. doi: 10.1016/j.jmb.2008.08.020.  
995 PubMed PMID: 18760285.
- 996 55. Ostash B, Walker S. Moenomycin family antibiotics: chemical synthesis, biosynthesis, and  
997 biological activity. Nat Prod Rep. 2010;27(11):1594-617. Epub 2010/08/24. doi: 10.1039/c001461n.  
998 PubMed PMID: 20730219; PubMed Central PMCID: PMCPMC2987538.
- 999 56. Mayer S, Steffen W, Steuber J, Götz F. The *Staphylococcus aureus* NuoL-like protein MpsA  
1000 contributes to the generation of membrane potential. J Bacteriol. 2015;197(5):794-806. Epub  
1001 2014/12/03. doi: 10.1128/JB.02127-14. PubMed PMID: 25448817; PubMed Central PMCID:  
1002 PMCPMC4325100.
- 1003 57. Tomita A, Zhang M, Jin F, Zhuang W, Takeda H, Maruyama T, et al. ATP-dependent  
1004 modulation of MgtE in Mg(2+) homeostasis. Nat Commun. 2017;8(1):148. Epub 2017/07/28. doi:  
1005 10.1038/s41467-017-00082-w. PubMed PMID: 28747715; PubMed Central PMCID:  
1006 PMCPMC5529423.
- 1007 58. Schuster CF, Bellows LE, Tosi T, Campeotto I, Corrigan RM, Freemont P, et al. The second  
1008 messenger c-di-AMP inhibits the osmolyte uptake system OpuC in *Staphylococcus aureus*. Sci Signal.  
1009 2016;9(441):ra81. Epub 2016/08/18. doi: 10.1126/scisignal.aaf7279. PubMed PMID: 27531650;  
1010 PubMed Central PMCID: PMCPMC5248971.
- 1011 59. Chan YG, Kim HK, Schneewind O, Missiakas D. The capsular polysaccharide of *Staphylococcus*  
1012 *aureus* is attached to peptidoglycan by the LytR-CpsA-Psr (LCP) family of enzymes. J Biol Chem.  
1013 2014;289(22):15680-90. Epub 2014/04/23. doi: 10.1074/jbc.M114.567669. PubMed PMID:  
1014 24753256; PubMed Central PMCID: PMCPMC4140922.



- 1015 60. Pöhlmann-Dietze P, Ulrich M, Kiser KB, Döring G, Lee JC, Fournier JM, et al. Adherence of  
1016 *Staphylococcus aureus* to endothelial cells: influence of capsular polysaccharide, global regulator  
1017 agr, and bacterial growth phase. *Infect Immun*. 2000;68(9):4865-71. Epub 2000/08/19. PubMed  
1018 PMID: 10948098; PubMed Central PMCID: PMCPMC101683.
- 1019 61. Pinho MG, Filipe SR, de Lencastre H, Tomasz A. Complementation of the essential  
1020 peptidoglycan transpeptidase function of penicillin-binding protein 2 (PBP2) by the drug resistance  
1021 protein PBP2A in *Staphylococcus aureus*. *J Bacteriol*. 2001;183(22):6525-31. Epub 2001/10/24. doi:  
1022 10.1128/JB.183.22.6525-6531.2001. PubMed PMID: 11673420; PubMed Central PMCID:  
1023 PMCPMC95481.
- 1024 62. Ochiai T. *Staphylococcus aureus* requires increased level of Ca(2+) or Mn(2+) to grow  
1025 normally in a high-NaCl/low-Mg(2+) medium. *Microbiol Immunol*. 2001;45(11):769-76. Epub  
1026 2002/01/17. PubMed PMID: 11791670.
- 1027 63. Schindelin J, Arganda-Carreras I, Frise E, Kaynig V, Longair M, Pietzsch T, et al. Fiji: an open-  
1028 source platform for biological-image analysis. *Nat Methods*. 2012;9(7):676-82. doi:  
1029 10.1038/nmeth.2019. PubMed PMID: 22743772; PubMed Central PMCID: PMCPMC3855844.
- 1030 64. Atilano ML, Pereira PM, Vaz F, Catalão MJ, Reed P, Grilo IR, et al. Bacterial autolysins trim  
1031 cell surface peptidoglycan to prevent detection by the *Drosophila* innate immune system. *Elife*.  
1032 2014;3:e02277. doi: 10.7554/eLife.02277. PubMed PMID: 24692449; PubMed Central PMCID:  
1033 PMCPMC3971415.
- 1034 65. Covas G, Vaz F, Henriques G, Pinho MG, Filipe SR. Analysis of Cell Wall Teichoic Acids in  
1035 *Staphylococcus aureus*. *Methods Mol Biol*. 2016;1440(1440):201-13. doi: 10.1007/978-1-4939-  
1036 3676-2\_15. PubMed PMID: 27311674.
- 1037 66. Corrigan RM, Abbott JC, Burhenne H, Kaefer V, Gründling A. c-di-AMP is a new second  
1038 messenger in *Staphylococcus aureus* with a role in controlling cell size and envelope stress. *PLoS*

- 1039 Pathog. 2011;7(9):e1002217. doi: 10.1371/journal.ppat.1002217. PubMed PMID: 21909268;  
1040 PubMed Central PMCID: PMC3164647.
- 1041 67. de Jonge BL, Chang YS, Gage D, Tomasz A. Peptidoglycan composition of a highly methicillin-  
1042 resistant *Staphylococcus aureus* strain. The role of penicillin binding protein 2A. J Biol Chem.  
1043 1992;267(16):11248-54. PubMed PMID: 1597460.
- 1044 68. Boles BR, Thoendel M, Roth AJ, Horswill AR. Identification of genes involved in  
1045 polysaccharide-independent *Staphylococcus aureus* biofilm formation. PLoS One.  
1046 2010;5(4):e10146. doi: 10.1371/journal.pone.0010146. PubMed PMID: 20418950; PubMed Central  
1047 PMCID: PMC2854687.
- 1048 69. Schuster CF, Bertram R. Fluorescence based primer extension technique to determine  
1049 transcriptional starting points and cleavage sites of RNases *in vivo*. J Vis Exp. 2014;(92):e52134. doi:  
1050 10.3791/52134. PubMed PMID: 25406941; PubMed Central PMCID: PMC4353401.
- 1051 70. Bowman L, Zeden MS, Schuster CF, Kaever V, Grundling A. New Insights into the Cyclic Di-  
1052 adenosine Monophosphate (c-di-AMP) Degradation Pathway and the Requirement of the Cyclic  
1053 Dinucleotide for Acid Stress Resistance in *Staphylococcus aureus*. J Biol Chem. 2016;291(53):26970-  
1054 86. Epub 2016/11/12. doi: 10.1074/jbc.M116.747709. PubMed PMID: 27834680; PubMed Central  
1055 PMCID: PMC5207132.
- 1056 71. Lee CY, Buranen SL, Ye ZH. Construction of single-copy integration vectors for *Staphylococcus*  
1057 *aureus*. Gene. 1991;103(1):101-5. PubMed PMID: 1652539.
- 1058 72. Gründling A, Schneewind O. Genes required for glycolipid synthesis and lipoteichoic acid  
1059 anchoring in *Staphylococcus aureus*. J Bacteriol. 2007;189(6):2521-30. doi: 10.1128/JB.01683-06.  
1060 PubMed PMID: 17209021; PubMed Central PMCID: PMC1899383.
- 1061 73. Monk IR, Shah IM, Xu M, Tan MW, Foster TJ. Transforming the untransformable: application  
1062 of direct transformation to manipulate genetically *Staphylococcus aureus* and *Staphylococcus*

1063 *epidermidis*. MBio. 2012;3(2). doi: 10.1128/mBio.00277-11. PubMed PMID: 22434850; PubMed  
1064 Central PMCID: PMC3312211.  
1065 74. Yao J, Zhong J, Fang Y, Geisinger E, Novick RP, Lambowitz AM. Use of targetrons to disrupt  
1066 essential and nonessential genes in *Staphylococcus aureus* reveals temperature sensitivity of Ll.LtrB  
1067 group II intron splicing. RNA. 2006;12(7):1271-81. doi: 10.1261/rna.68706. PubMed PMID:  
1068 16741231; PubMed Central PMCID: PMC1484445.  
1069  
1070

1071 **Figure legends**

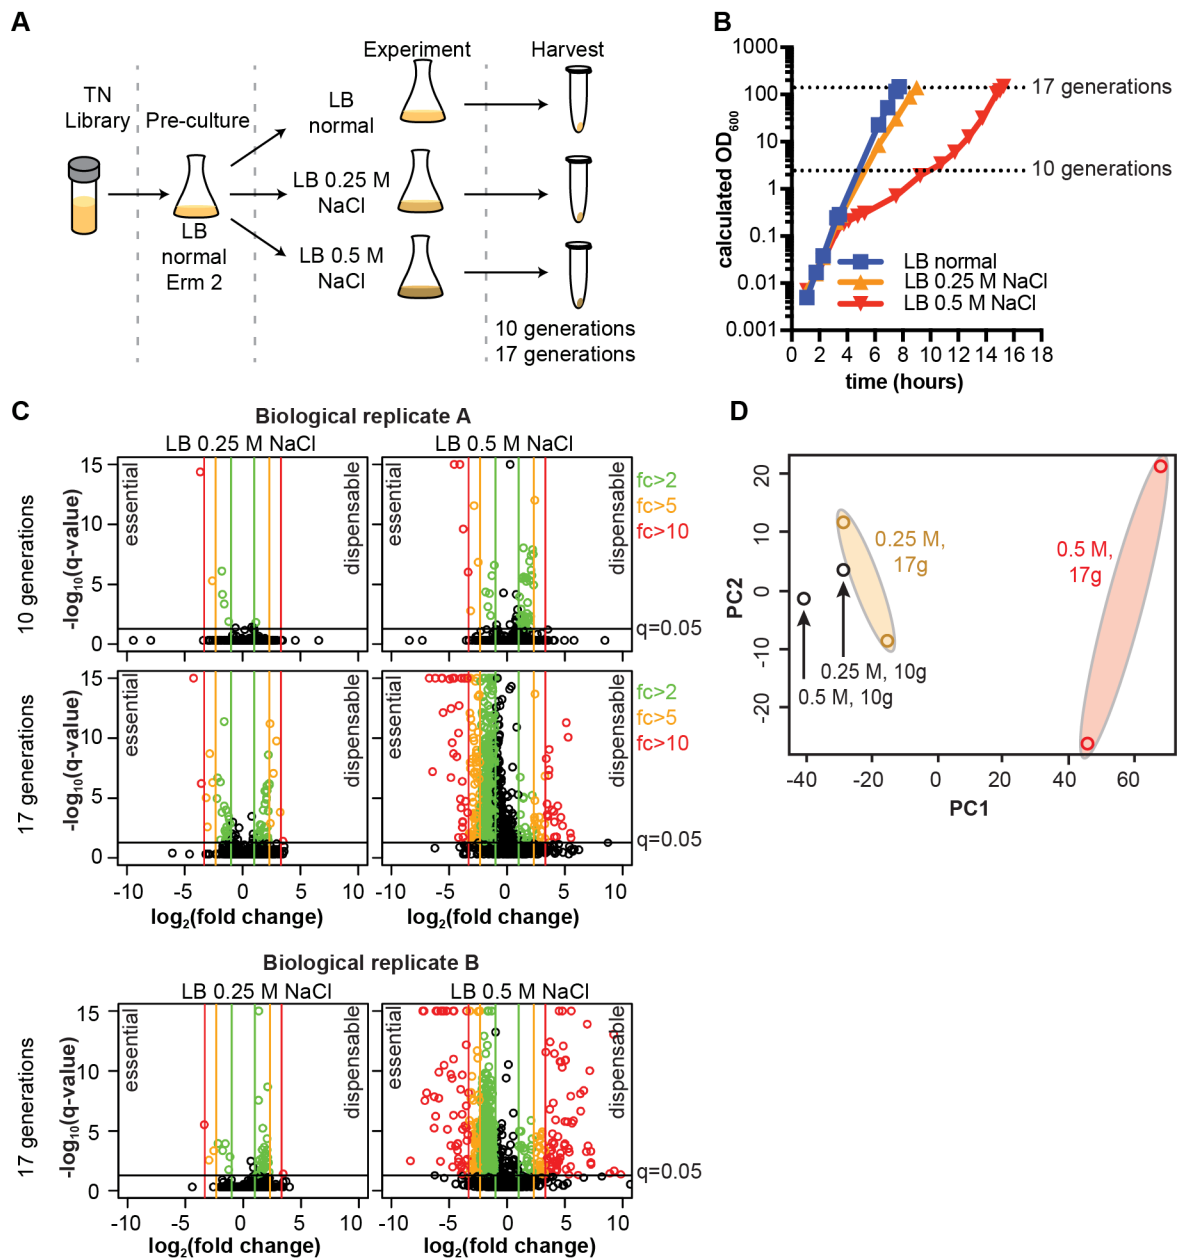

1072

1073 **Fig. 1. TN-Seq screen reveals essential and dispensable genes during prolonged NaCl stress in *S.***  
 1074 ***aureus*.**

1075 (A) Workflow of TN-seq experiments. A saturated transposon library was pre-cultured for one hour,  
 1076 then used to inoculate LB medium containing either normal levels (0.086 M), 0.25 M or 0.5 M of  
 1077 NaCl. After 10 and 17 generations, cells were harvested, and transposon insertion sites determined  
 1078 by high throughput sequencing.

1079 (B) Growth curve. Growth of the *S. aureus* library culture in LBN, LB 0.25 M NaCl and LB 0.5 M  
 1080 medium was followed by determining OD<sub>600</sub> readings. Dotted lines indicate 10 and 17 generation

1081 thresholds. Cultures were back-diluted once when they reached an OD of approximately 0.3 and the  
1082 optical densities shown are calculated from measured ODs time dilution factor. Culture from  
1083 replicate B (n=1) is shown and a similar growth profile was seen for replicate A.

1084 (C) Volcano plots of essential and dispensable genes in NaCl conditions compared to LBN. Negative  
1085  $\log_2$  fold-changes indicate essential and positive  $\log_2$  fold-changes dispensable genes. q-value stands  
1086 for Benjamini-Hochberg false discovery rate. Black horizontal line indicates q-value of 0.05 (cut-off)  
1087 and red, orange and green vertical lines 10-, 5- and 2-fold differences in either direction. Colored  
1088 circles indicate genes for which a significant change in the number of transposon insertions was  
1089 observed above q-value cutoff and follow the same color code as the vertical lines. Bacteria in  
1090 replicate A (top) were grown in 0.25 M and 0.5 M NaCl for 10 and 17 generations, whereas bacteria  
1091 in replicate B (bottom) were only grown for 17 generations (n=1 for each plot).

1092 (D) Principal component analysis (PCA). A PCA was performed on the TN-seq data for replicates A  
1093 and B shown in panel (C). The data for the 17 generation 0.25 M (orange) and 0.5 M NaCl (red)  
1094 growth conditions clustered together, indicating good reproducibility between the two replicates.

1095

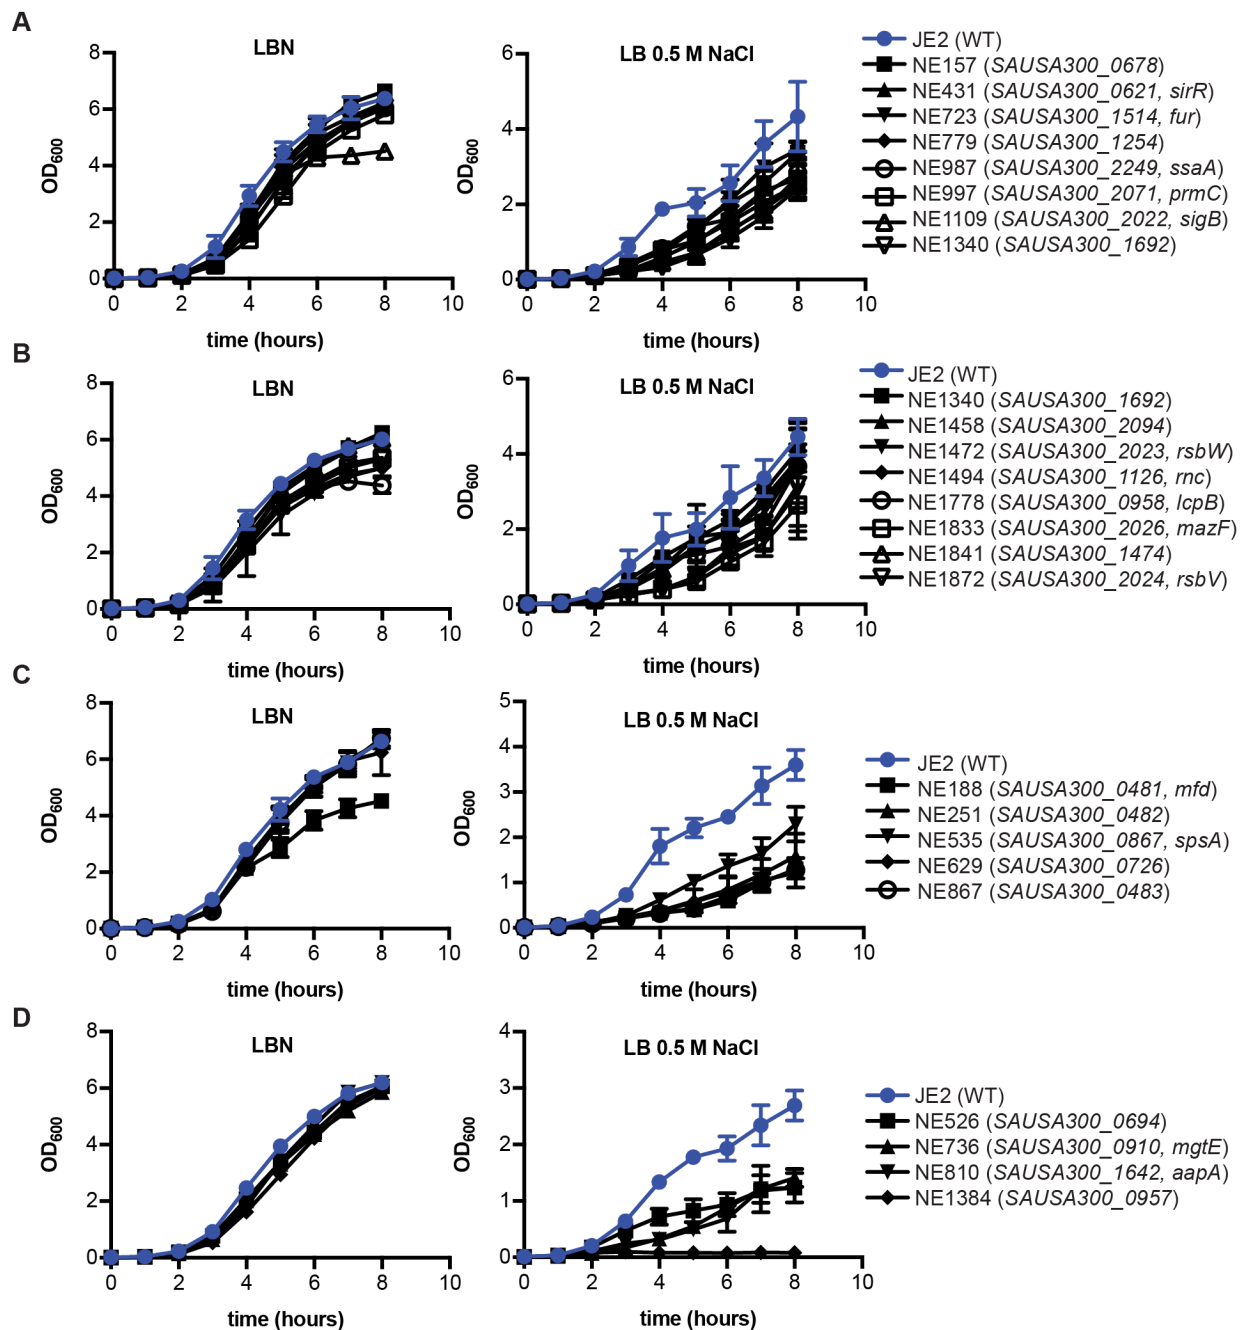

1096

1097 **Fig. 2. Growth curves of *S. aureus* strains with transposon insertions in potential salt essential**  
 1098 **genes.**

1099 *S. aureus* strain JE2 (WT) and strains from the Nebraska Transposon Mutant Library (NTML)  
 1100 containing transposon insertions in potential salt essential genes were grown in LBN (left column)  
 1101 or 0.5 M NaCl LB medium (right column) and their growth monitored over 8 hours. Transposon  
 1102 mutant strains shown in panels (A) and (B) had a mild growth defect while strains shown in panels  
 1103 (C) and (D) had a stronger growth defect when grown in the high salt medium. NE numbers

1104 correspond to the NTML mutant number. Locus tag number and where available gene names with  
1105 transposon insertion site are given in parenthesis. Growth curves were performed in triplicates  
1106 (n=3) and means and SDs were plotted.

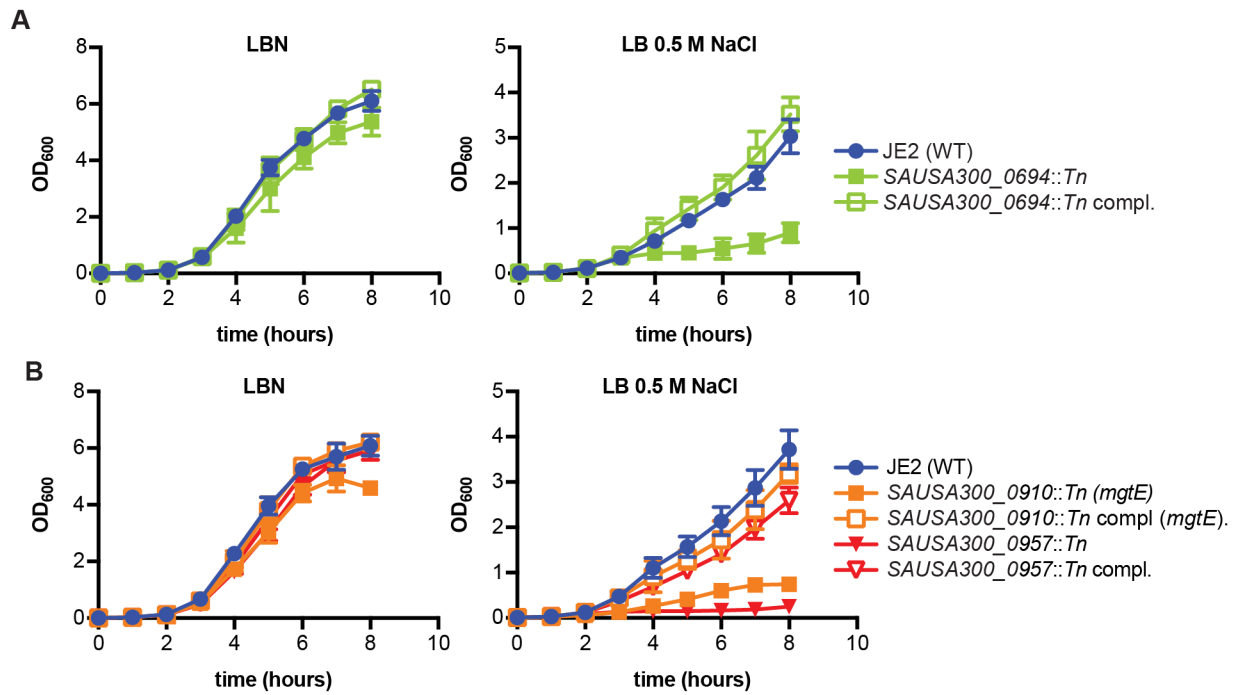

1107

1108 **Fig. 3. Growth curves and complementation analysis of *S. aureus* strains with transposon**  
1109 **insertions in salt essential genes.**

1110 *S. aureus* strains (A) JE2 (WT), *SAUSA300\_0694::Tn* mutant with empty plasmid and  
1111 complementation strain or (B) JE2 (WT), *SAUSA300\_0910 (mgtE)*, *SAUSA300\_0957::Tn* with empty  
1112 plasmid and respective complementation strains were grown in LBN (left panels) or LB 0.5 M NaCl  
1113 medium (right panels) supplemented with 100 ng/ml Atet and OD<sub>600</sub> readings determined at timed  
1114 intervals. Growth curves were performed in triplicates (n=3) and means and SDs of OD<sub>600</sub> readings  
1115 were plotted.

1116



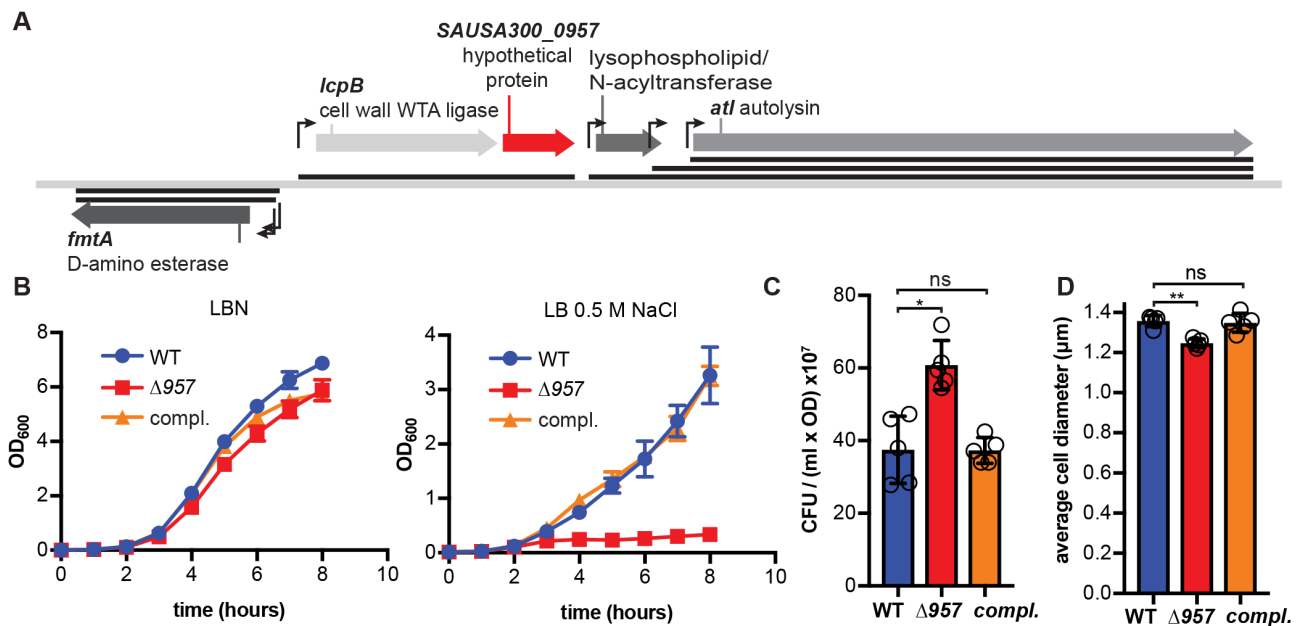

1117

1118

1119

**Fig. 4. Gene *SAUSA300\_0957* is located in a genomic region with cell envelope genes and its deletion leads to salt sensitivity and other phenotypic changes.**

1120

1121

(A) Schematic of the *S. aureus* USA300 FPR3757 chromosomal region with gene *SAUSA300\_0957*

1122

(gene 957). Gene 957 is encoded in an operon with *lcpB*, which codes for a wall teichoic acid ligase.

1123

*fmtA*, a proposed D-amino esterase acting on teichoic acid and genes coding for a predicted

1124

acyltransferase and the major autolysin *Atl* are located up and downstream of this operon. Putative

1125

promoters are shown as angled arrows (adapted from [44]) and black bars indicate the

1126

corresponding transcripts.

1127

(B) Growth curves. *S. aureus* strains LAC\* piTET (WT), LAC\* $\Delta 957$  piTET ( $\Delta 957$ ) and the

1128

complementation strain LAC\* $\Delta 957$  piTET-957 (compl.) were grown in LBN or LB containing 0.5 M

1129

NaCl medium and 100 ng/ml Atet. The growth was monitored by determining OD<sub>600</sub> readings the

1130

means and SDs from three independent experiments were plotted.

1131

(C) Determination of CFU/OD ratios. OD<sub>600</sub> values as well as CFU/ml were determined for overnight

1132

cultures of the *S. aureus* strains described in panel (B) and the means and SDs of the CFU per ml

1133

OD<sub>600</sub> of 1 from five independent experiments were plotted.

1134 (D) Cell size measurements. The cell walls of the *S. aureus* strains described in panel (B) were stained  
1135 with fluorescently labelled vancomycin and the cells subsequently observed under a microscope.  
1136 The diameters of 200 cells were measured and the means calculated. This average of the means and  
1137 SDs from five independent experiments were plotted.  
1138 For statistical analysis, a Kruskal-Wallis one-way ANOVA test was performed followed by a Dunn's  
1139 post-hoc test to determine p-values. Asterisks (\*) indicate  $p \leq 0.05$  and two asterisks (\*\*)  $p \leq 0.01$  and  
1140 ns=not significant.  
1141

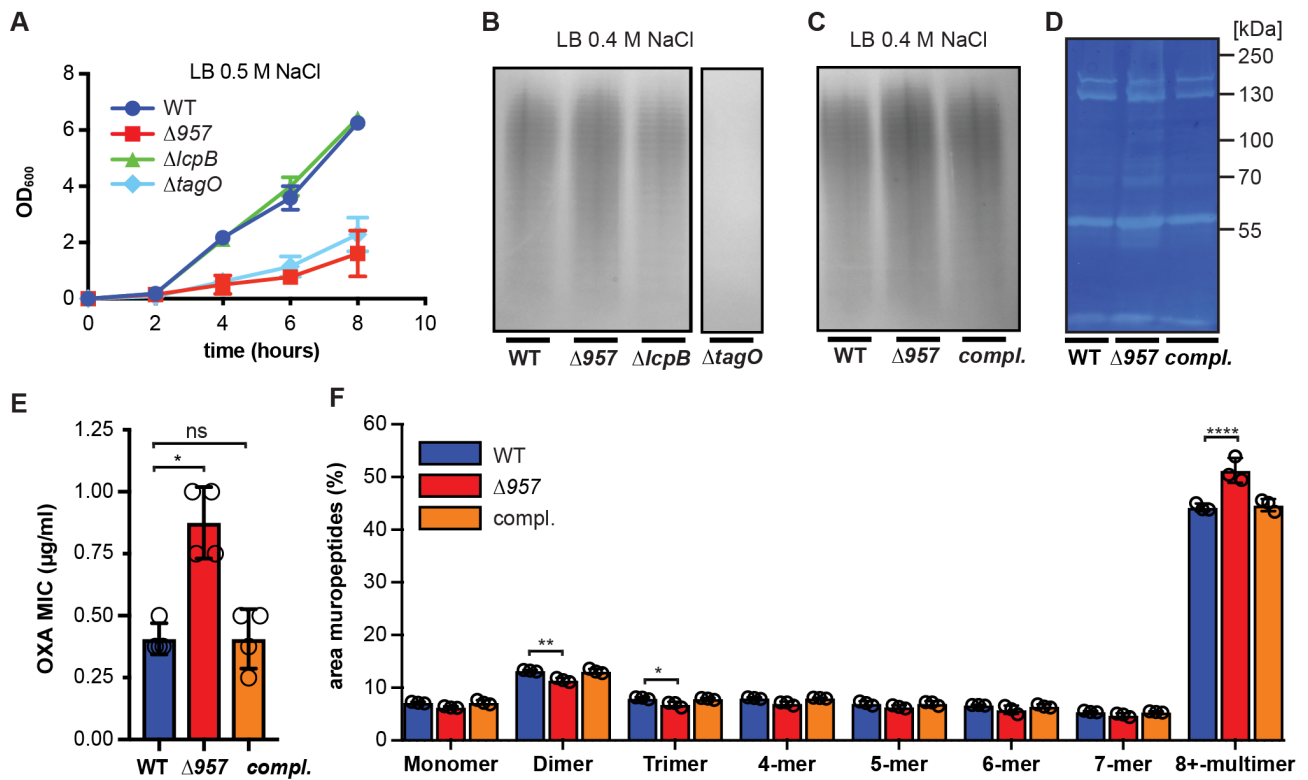

1142

1143 **Fig. 5. Inactivation of gene 957 leads to an increase in peptidoglycan crosslinking.**

1144 (A) Growth curves. *S. aureus* strains LAC\* (WT), LAC\*Δ957 (Δ957), LAC\*ΔlcpB, (Δ957), and  
 1145 LAC\*ΔtagO (ΔtagO) were grown in LB 0.5 M NaCl medium and OD<sub>600</sub> readings determined at timed  
 1146 intervals. The means and SDs from three biological replicates were plotted.

1147 (B) Detection of WTA on silver stained gels. WTA was isolated from *S. aureus* strains described in  
 1148 panel (A) following growth in LB 0.4 M NaCl medium. The WTA was separated by electrophoresis  
 1149 and visualized by silver stain. The experiment was performed three times and one representative  
 1150 gel image is shown.

1151 (C) Detection of WTA on silver stained gels. Same as (B) but using the strains LAC\* piTET (WT),  
 1152 LAC\*Δ957 piTET (Δ957), and the complementation strain LAC\*Δ957 piTET-957 (compl.) grown in LB  
 1153 0.4 M NaCl medium also containing 100 ng/ml Atet.

1154 (D) Zymogram gel. Cell extracts prepared from *S. aureus* strains described in panel (C) were  
 1155 separated on a gel containing heat killed *Micrococcus luteus* cells. Autolysins were renatured and

1156 the zones of lysis visualized by methylene blue staining. The experiment was performed twice and  
1157 one experiment is shown.

1158 (E) Determination of oxacillin MICs. Oxacillin MICs were determined for *S. aureus* strains described  
1159 in panel (C) using Etest strips. The median and SDs from four biological replicates were plotted.

1160 (F) Muropeptide analysis. The same *S. aureus* strains as described in (C) were grown in LB 0.4 M  
1161 NaCl medium also containing 100 ng/ml Atet, peptidoglycan isolated and digested with mutanolysin  
1162 and the resulting muropeptide fragments separated by HPLC. Representative chromatograms are  
1163 shown in Supplementary Figures S5E. The peak area of individual peaks (corresponding to monomer  
1164 up to 8-mers and above) were quantified and the means and SDs from three biological replicates  
1165 plotted.

1166 For statistical analysis of the oxacillin MICs in (E) a Kruskal-Wallis one-way ANOVA and a Dunn's  
1167 post-hoc test was performed and for the muropeptide analysis in (F) a two-way ANOVA and a  
1168 Dunnett's post-hoc test. One asterisk (\*) indicates  $p \leq 0.05$ , two asterisks (\*\*)  $p \leq 0.01$  and four  
1169 asterisks (\*\*\*\*)  $p \leq 0.0001$ . ns=not significant.

1170

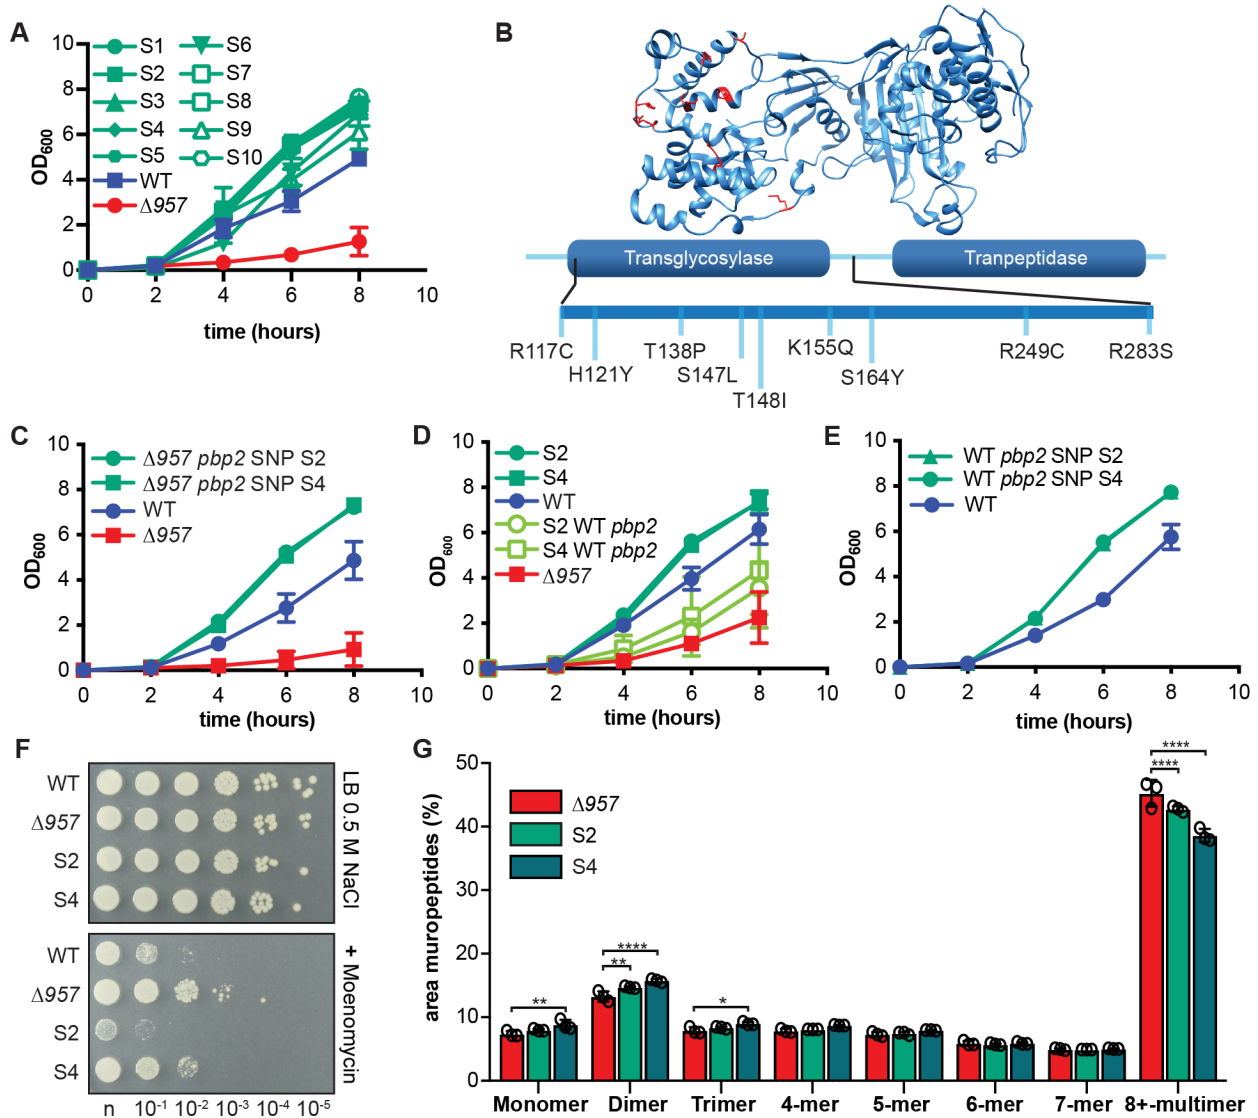

1171

1172 **Fig. 6. The growth and peptidoglycan defect observed for the 957 mutant can be rescued by**  
 1173 **compensatory mutations in *pbp2*.**

1174 (A) Growth curves. *S. aureus* strains LAC\* (WT), LAC\*Δ957 (Δ957) and the LAC\*Δ957 suppressors  
 1175 S1-10 (S1 to 10) were grown in LB 0.5 M NaCl medium, OD<sub>600</sub> readings determined and the means  
 1176 and SDs of four biological replicates plotted.

1177 (B) Schematic of Pbp2 with amino acid substitutions identified. Top: Structure of the *S. aureus*  
 1178 penicillin binding protein Pbp2 (PDB: 3DWK, [54]) with amino acids that are altered in the obtained  
 1179 suppressor strains shown in red. Bottom: Schematic of the Pbp2 enzyme with the transglycosylase

1180 and transpeptidase domains as well as the observed amino acid changes in the transglycosylase  
1181 domain indicated.

1182 (C) Growth curves using 957 mutant strains containing *pbp2* alleles from suppressors S2 and S4.  
1183 Growth curves were performed in LB 0.5 M NaCl medium and plotted as described in panel (A) but  
1184 using *S. aureus* strains LAC\* 1332::Tn (WT), LAC\* $\Delta$ 957 1332::Tn ( $\Delta$ 957), LAC\* $\Delta$ 957 1332::Tn *pbp2*  
1185 SNP S2 ( $\Delta$ 957 *pbp2* SNP S2), LAC\* $\Delta$ 957 suppressor S4 1332::Tn ( $\Delta$ 957 *pbp2* SNP S4).

1186 (D) Growth curves using 957 suppressors with their *pbp2* gene repaired to WT. Growth curves were  
1187 performed in LB 0.5 M NaCl medium and plotted as described in panel (A) but using *S. aureus* strains  
1188 LAC\* 1332::Tn (WT), LAC\* $\Delta$ 957 1332::Tn ( $\Delta$ 957), LAC\* $\Delta$ 957 suppressor S2 1332::Tn (S2), LAC\* $\Delta$ 957  
1189 suppressor S4 1332::Tn (S4), LAC\* $\Delta$ 957 suppressor S2 1332::Tn repaired WT *pbp2* (S2 WT *pbp2*),  
1190 and LAC\* $\Delta$ 957 suppressor S4 1332::Tn repaired WT *pbp2* (S4 WT *pbp2*).

1191 (E) Growth curves using WT strains carrying *pbp2* SNPs. *S. aureus* strains LAC\* 1332::Tn (WT), LAC\*  
1192 1332::Tn *pbp2* SNP S2 (WT *pbp2* SNP S2) and LAC\* 1332::Tn *pbp2* SNP S4 (WT *pbp2* SNP S4) were  
1193 grown in LB 0.5 M NaCl medium and OD<sub>600</sub> readings determined and the means and SDs of three  
1194 biological replicates plotted.

1195 (F) Bacterial growth on moenomycin supplemented agar plates. *S. aureus* strains LAC\* (WT),  
1196 LAC\* $\Delta$ 957 ( $\Delta$ 957), LAC\* $\Delta$ 957 Suppressor S2 (S2) and S4 LAC\* $\Delta$ 957 Suppressor S4 (S4) were grown  
1197 to exponential phase, normalized to an OD<sub>600</sub> of 0.1 and plated either neat (n) or in 10-fold dilutions  
1198 onto LB agar containing 0.5 M NaCl without (top) or with (bottom) moenomycin. Shown is one  
1199 representative image of three biological replicates.

1200 (G) Muropeptide analysis. *S. aureus* strains LAC\* $\Delta$ 957 ( $\Delta$ 957), LAC\* $\Delta$ 957 Suppressor S2 (S2) and S4  
1201 LAC\* $\Delta$ 957 Suppressor S4 (S4) were grown in 0.4 M NaCl LB medium and muropeptides quantified  
1202 as described in Fig 5F. Representative chromatograms are shown in Supplementary Figure S7D. The  
1203 means and SDs from three biological replicates were plotted. For statistical analysis a two-way

1204 ANOVA and Dunnett's post-hoc test was performed. One asterisk (\*) indicates  $p \leq 0.05$ , two asterisks  
1205 (\*\*)  $p \leq 0.01$  and four asterisks (\*\*\*\*)  $p \leq 0.0001$ .

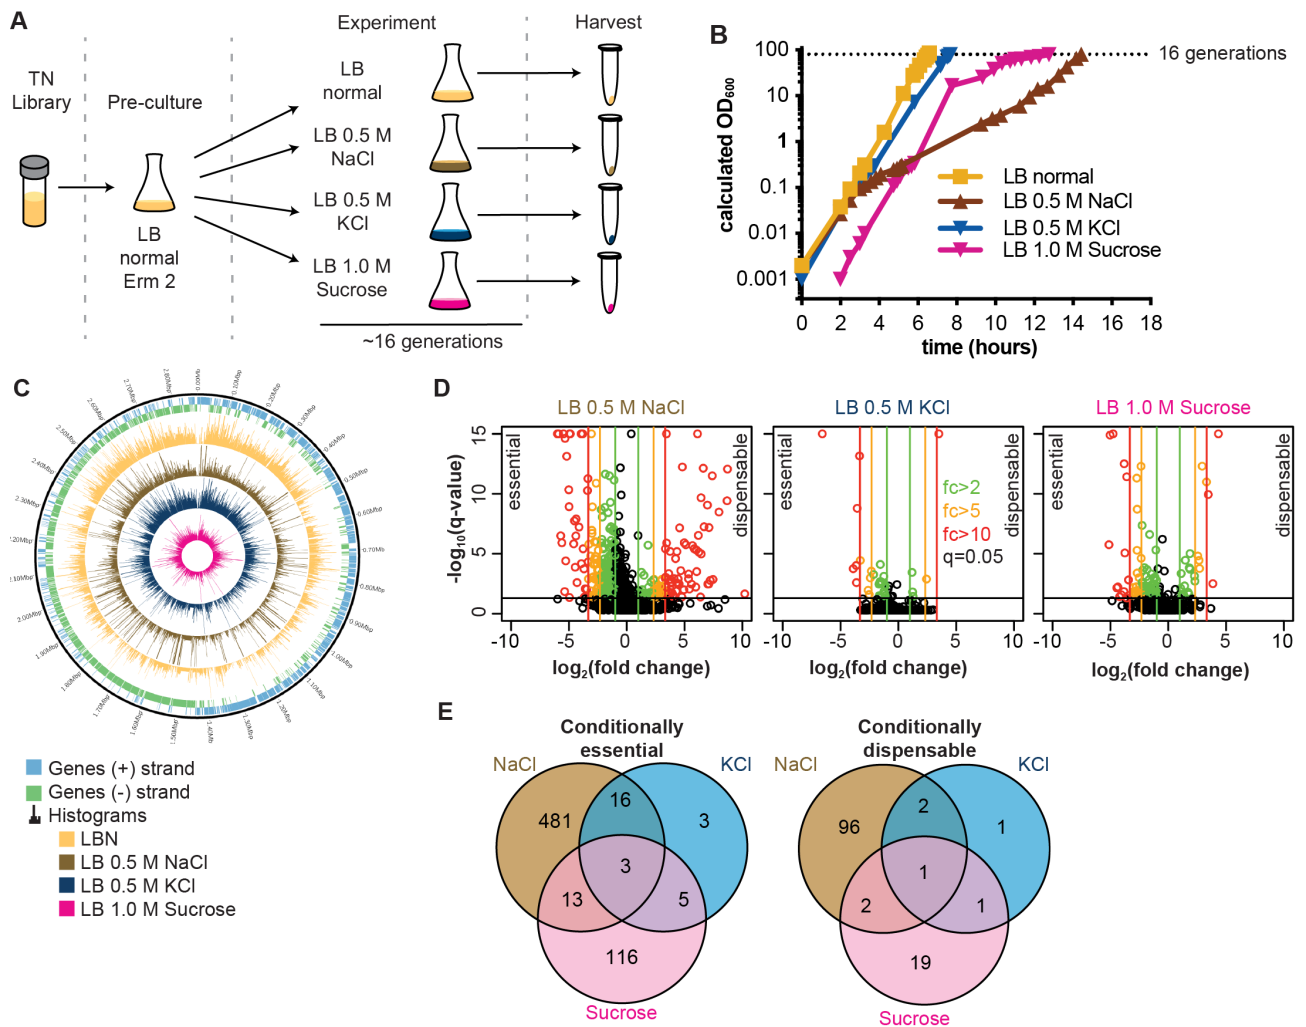

1206

1207 **Fig. 7. Different sets of genes are conditionally essential for the growth of *S. aureus* under NaCl,**

1208 **KCl or sucrose stress conditions.**

1209 (A) Workflow of the TN-seq experiment. A TN-seq library was pre-cultured and then used to

1210 inoculate LBN, LB containing 0.5 M NaCl, 0.5 M KCl or 1 M sucrose. Cells were kept in exponential

1211 phase for 16 generations, harvested and transposon insertion sites determined by high throughput

1212 sequencing.

1213 (B) Growth curves. For the TN-seq experiment ( $n=1$ ), the growth of an *S. aureus* library cultured in

1214 LBN, LB 0.5M NaCl, LB 0.5 M KCl or LB 1.0 M sucrose medium was followed by taking OD<sub>600</sub>

1215 measurements at timed intervals. The cultures were back-diluted once when they reached an OD<sub>600</sub>

1216 of approximately 0.3. The plotted OD<sub>600</sub> values were calculated by multiplying the measured OD<sub>600</sub>



1217 with the dilution factor. The dotted line indicates the 16 generation cut-off at which cultures were  
1218 harvested.

1219 (C) Circular plot showing the transposon insertion density along the *S. aureus* genome under  
1220 different osmotic stress conditions. The two outer rings depict genes located on the (+) or (-) strand  
1221 in *S. aureus* strain USA300 FPR3757. The inner four rings show the histograms of transposon  
1222 insertions on a per gene basis after growth of the library in LBN (orange), 0.5 M NaCl (brown), 0.5  
1223 M KCl (blue) and 1 M sucrose (pink) medium for 16 generations.

1224 (D) Volcano plots of conditionally essential and dispensable genes following growth of *S. aureus* in  
1225 0.5 M NaCl, 0.5 M KCl or 1 M sucrose medium and compared to LBN conditions. q-values represent  
1226 Benjamini-Hochberg corrected p-values, and  $\log_2$  (fold changes) indicate essential genes (negative  
1227 values) or dispensable genes (positive values). The black horizontal line indicates a q-value of 0.05,  
1228 which was deemed the significance level. Vertical lines indicate 2- (green), 5- (orange) or 10- (red)  
1229 fold changes in either direction. Each dot represents one gene and coloring follows the fold-change  
1230 scheme whenever the q-value threshold was met. The TN-seq experiments were conducted once  
1231 (n=1).

1232 (E) Venn diagrams showing overlaps of conditionally essential and dispensable genes during  
1233 prolonged NaCl, KCl or sucrose stress. Genes with a 2-fold decrease (essential genes) or a 2-fold  
1234 increase (dispensable genes) in transposon insertions under each stress condition compared to the  
1235 LBN condition and a q-value of  $\leq 0.05$  were determined and the overlap between these gene lists  
1236 displayed in Venn diagrams.

1237

Conditionally essential genes

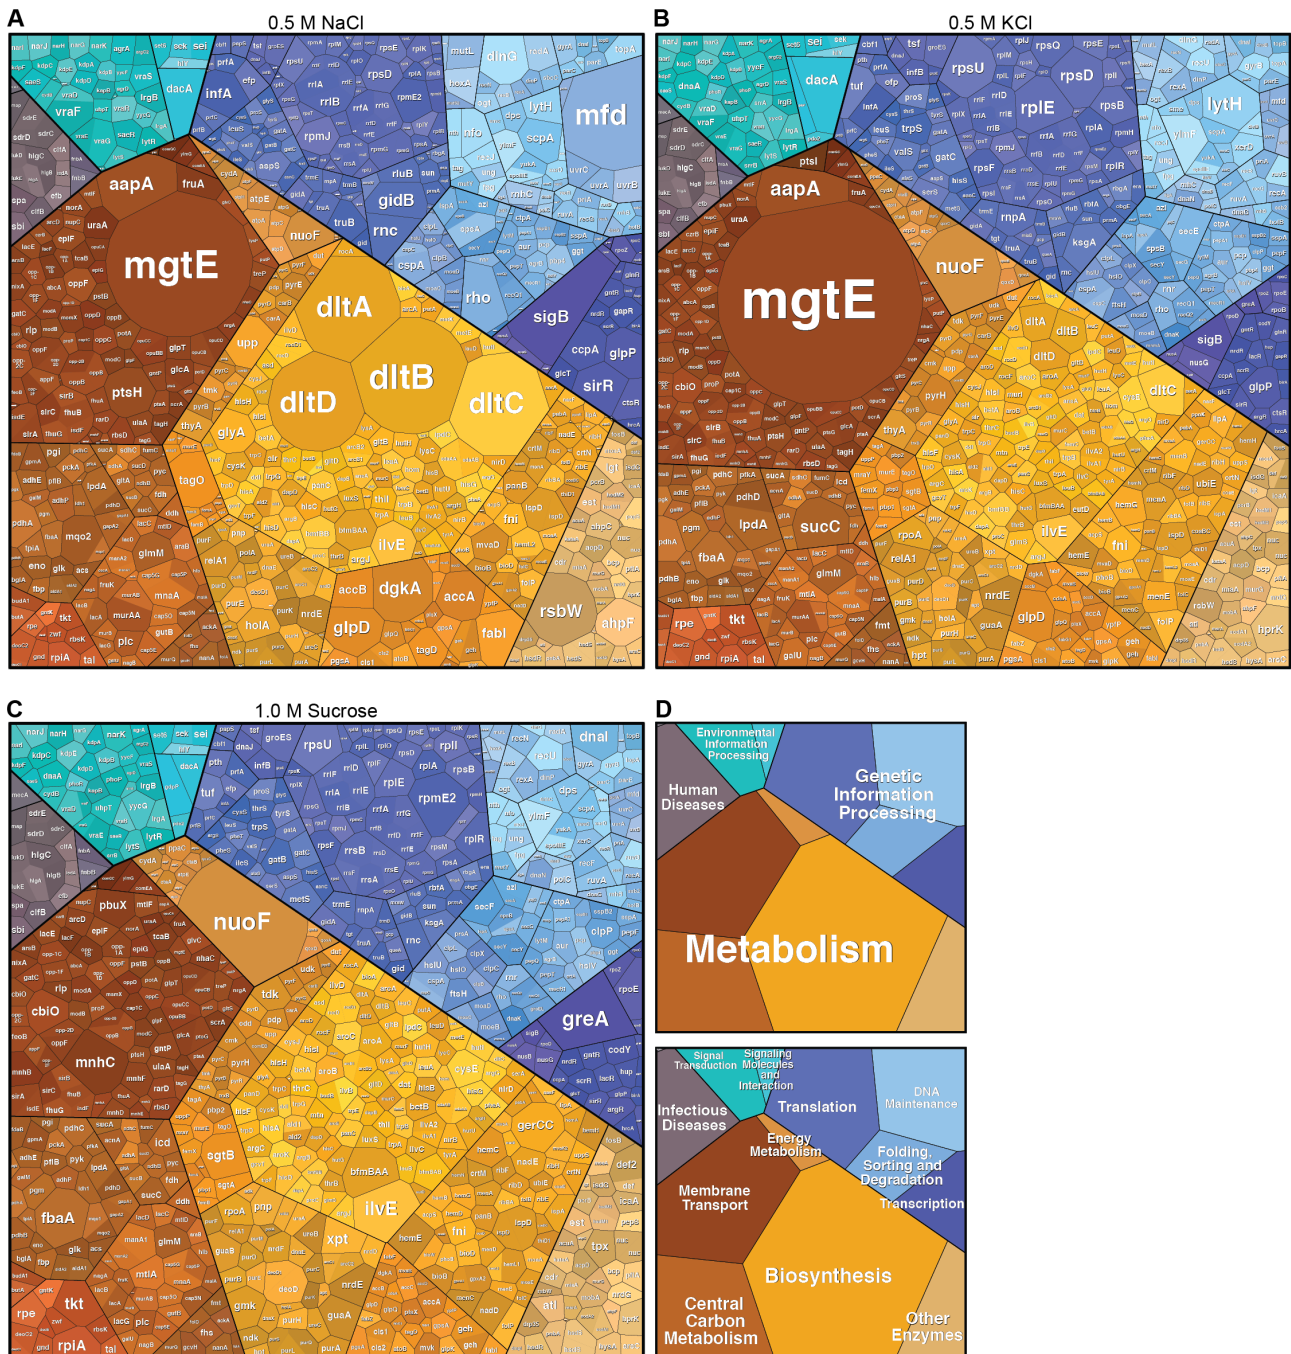

1238

1239 **Fig. 8. Voronoi diagram-based visualization of conditionally essential *S. aureus* genes when**  
 1240 **exposed to different osmotic stressors underlines differences.**

1241 Conditionally essential genes of *S. aureus* strains grown either in 0.5 M NaCl (A), 0.5 M KCl (B) or 1.0  
 1242 M sucrose (C) were mapped to cellular functions. Area sizes were adjusted to their essentiality  
 1243 regardless of p- or q-value to visualize differences on a genome wide level. The larger the area, the

1244 higher the number of transposon insertions in the LBN control condition as compared to the stress  
1245 conditions. Colors of polygons indicate cellular functions as detailed in (D).  
1246

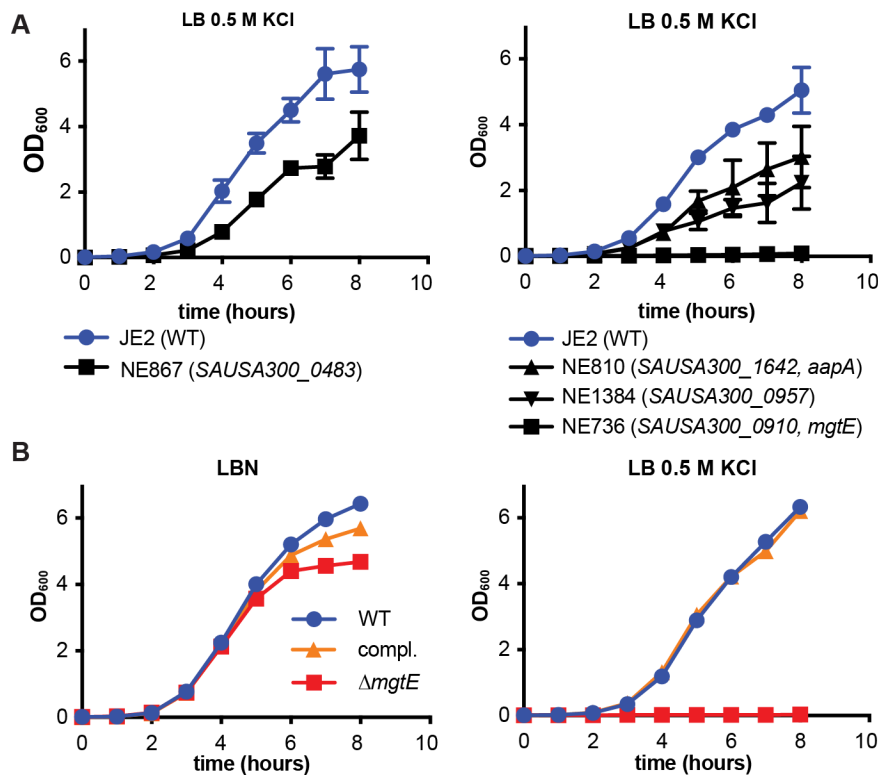

1247

1248 **Fig. 9. Growth curves of putative potassium sensitive mutants in LB containing 0.5 M KCl.**

1249 (A) Growth curves using putative KCl sensitive mutants. *S. aureus* strain JE2 (WT) and strains from  
 1250 the Nebraska Transposon Mutant Library (NTML) containing transposon insertions in the indicated  
 1251 and potential KCl essential genes were grown in LB 0.5 M KCl medium and the mean and SDs of the  
 1252 OD<sub>600</sub> readings from three biological replicates plotted.

1253 (B) Growth curves using a clean  $\Delta mgtE$  deletion and complementation strain. *S. aureus* strains LAC\*  
 1254 piTET (WT), LAC\* $\Delta mgtE$  piTET ( $\Delta mgtE$ ) and the complementation strain LAC\* $\Delta mgtE$  piTET-*mgtE*  
 1255 (compl.) were grown in LB 0.5 M KCl also containing 100 ng/ml Atet and the mean and SDs of the  
 1256 OD<sub>600</sub> readings from three biological replicates were plotted.

1257

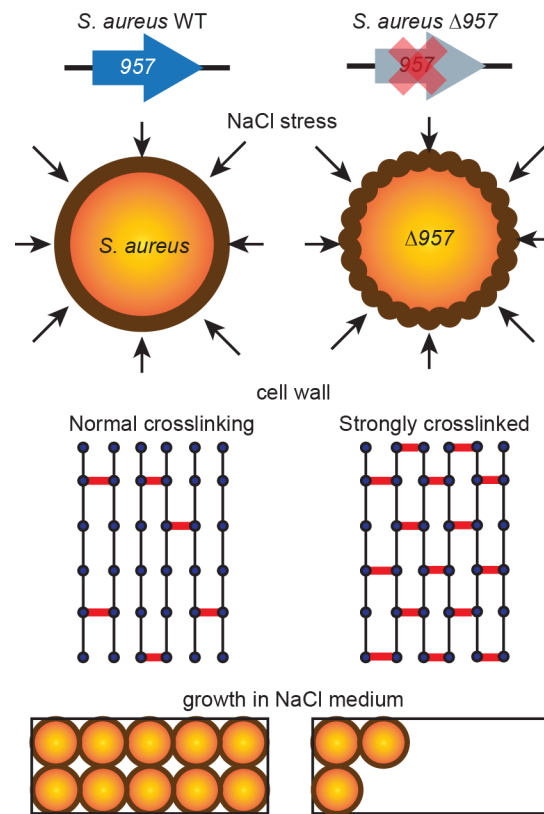

1258

1259 **Fig. 10. Proposed model of 957 activity during NaCl stress.**

1260 *S. aureus* is normally able to grow in medium containing up to 2.5 M NaCl. The deletion of gene 957

1261 leads to a strong growth defect in high salt conditions and changes in the peptidoglycan structure.

1262 We speculate that the observed increase in peptidoglycan crosslinking will lead to an increased

1263 rigidity of the cell wall and disadvantage and increased cell wall damage when these cells are

1264 exposed to osmotic stress conditions.

1265

1266 **Supplementary Figures**

10 generations  
Dataset A

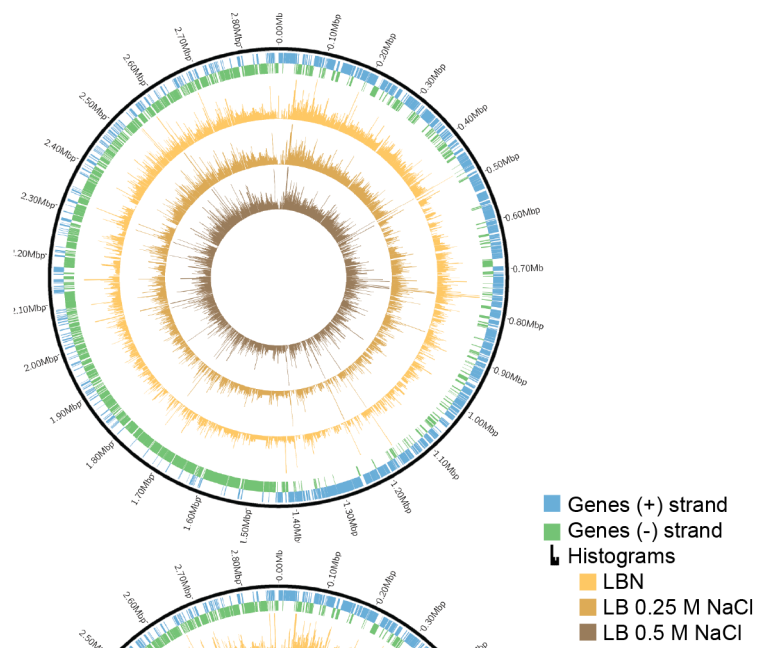

17 generations  
Dataset A

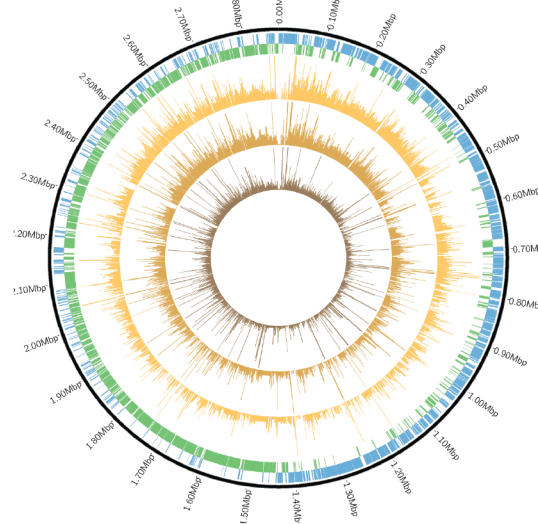

17 generations  
Dataset B

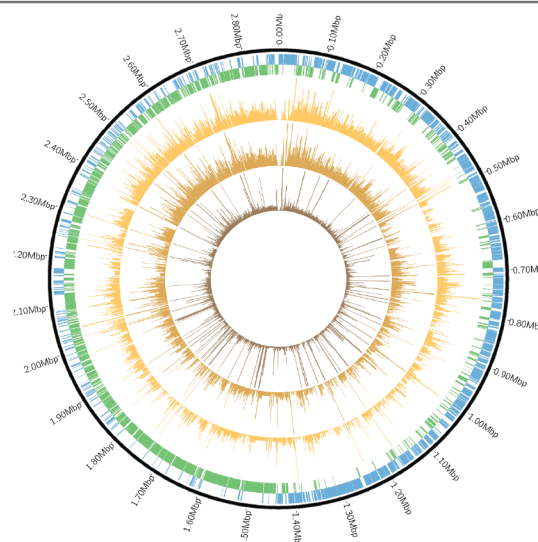

1267

1268 **Supplementary Fig. 1. Circos plots showing transposon insertions in the *S. aureus* genome**  
1269 **following growth under different conditions.**

1270 The outer two bands represent genes on the forward (blue) and reverse (green) strand, respectively.

1271 The inner three rings represent transposon insertions per gene following the growth of *S. aureus* in

1272 in either LBN (red), LB 0.25 M NaCl (purple) or LB 0.5 M NaCl (blue). The top two panels are for

1273 dataset A and growth for 10 or 17 generations and the lower panel is for dataset B and growth for

1274 17 generations.

1275



Conditionally essential genes at 0.5 M NaCl and 17 generations

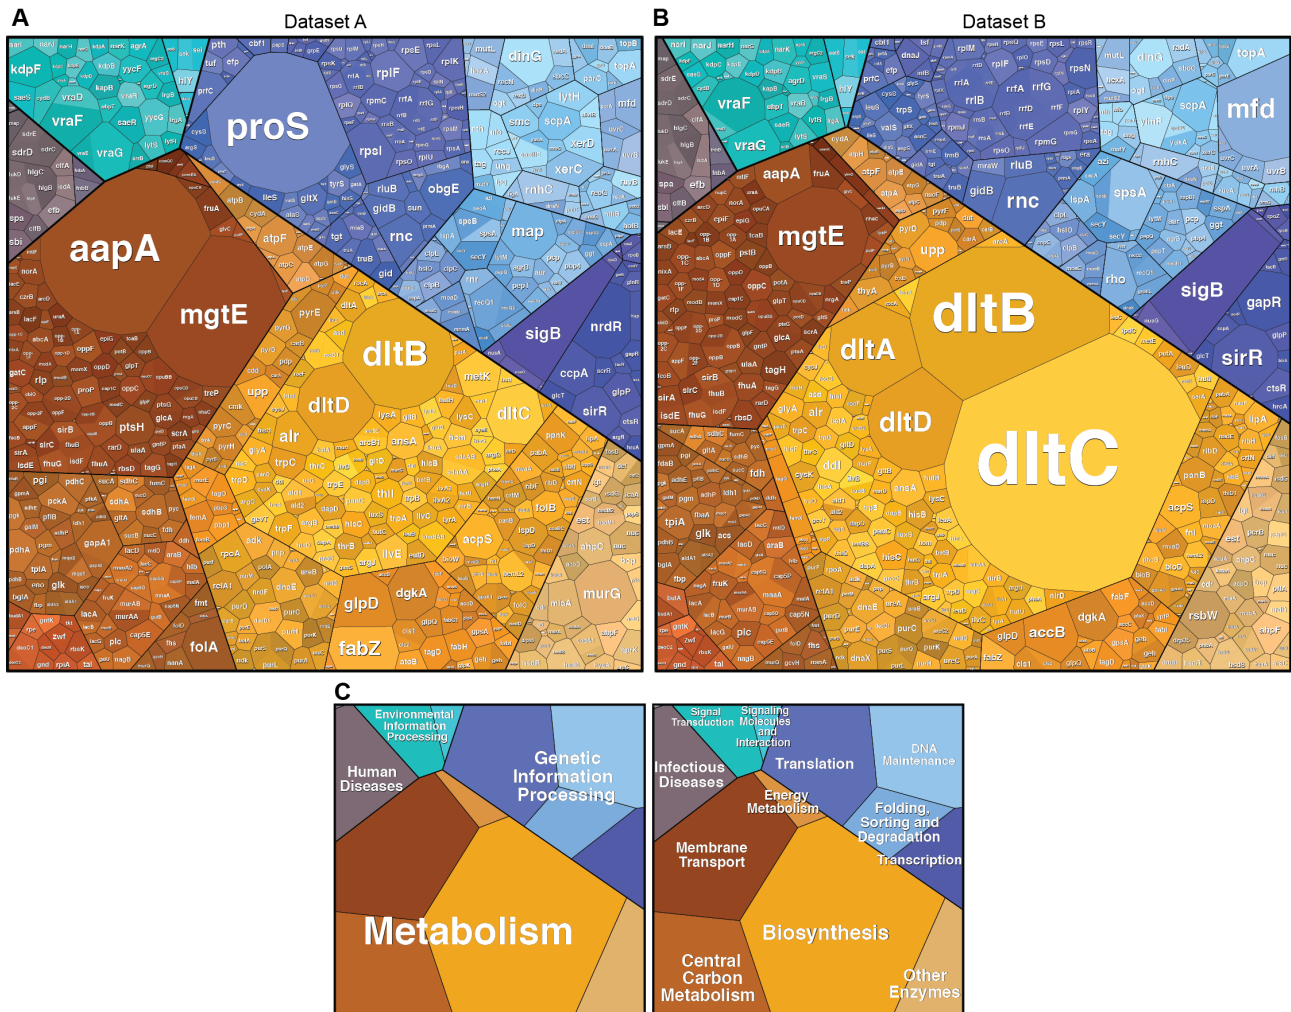

1276

1277 **Supplementary Fig. 2. Voronoi diagram-based visualization of *S. aureus* conditionally essential**  
1278 **genes when exposed to 0.5 M NaCl.**

1279 Conditionally essential *S. aureus* genes from replicate A (A) and replicate B (B) grown in 0.5 M NaCl  
1280 for 17 generations were mapped to cellular functions with area sizes adjusted to their essentiality  
1281 regardless of p- or q-value. The larger the area, the lower the number of transposon insertions in  
1282 stress condition as compared to the LBN control condition. Colors of polygons indicate cellular  
1283 functions as detailed in (C).

1284



Conditionally dispensable genes at 0.5 M NaCl and 17 generations

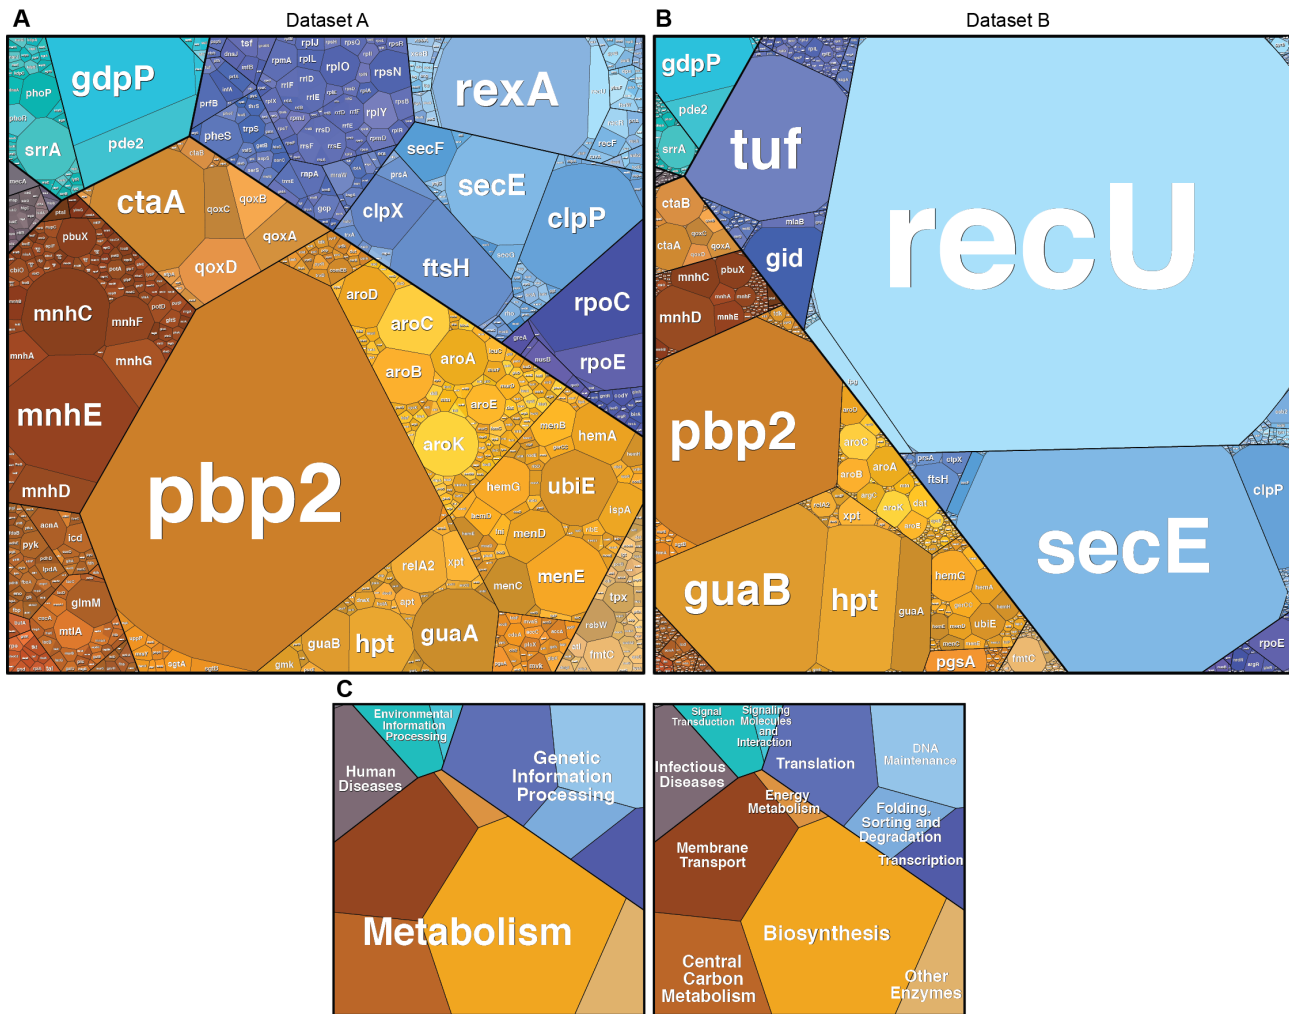

1285

1286 **Supplementary Fig. 3. Voronoi diagram-based visualization of *S. aureus* conditionally dispensable**  
1287 **genes when exposed to 0.5 M NaCl.**

1288 Conditionally dispensable *S. aureus* genes from replicate A (A) and replicate B (B) grown in 0.5 M  
1289 NaCl for 17 generations were mapped to cellular functions with area sizes adjusted to their  
1290 dispensability regardless of p- or q-value. The larger the area, the higher the number of transposon  
1291 insertions in the stress condition as compared to the LBN control. *recU* was scaled to 1/5 of the  
1292 original ratio to preserve space. Colors of polygons indicate cellular functions as detailed in (C).

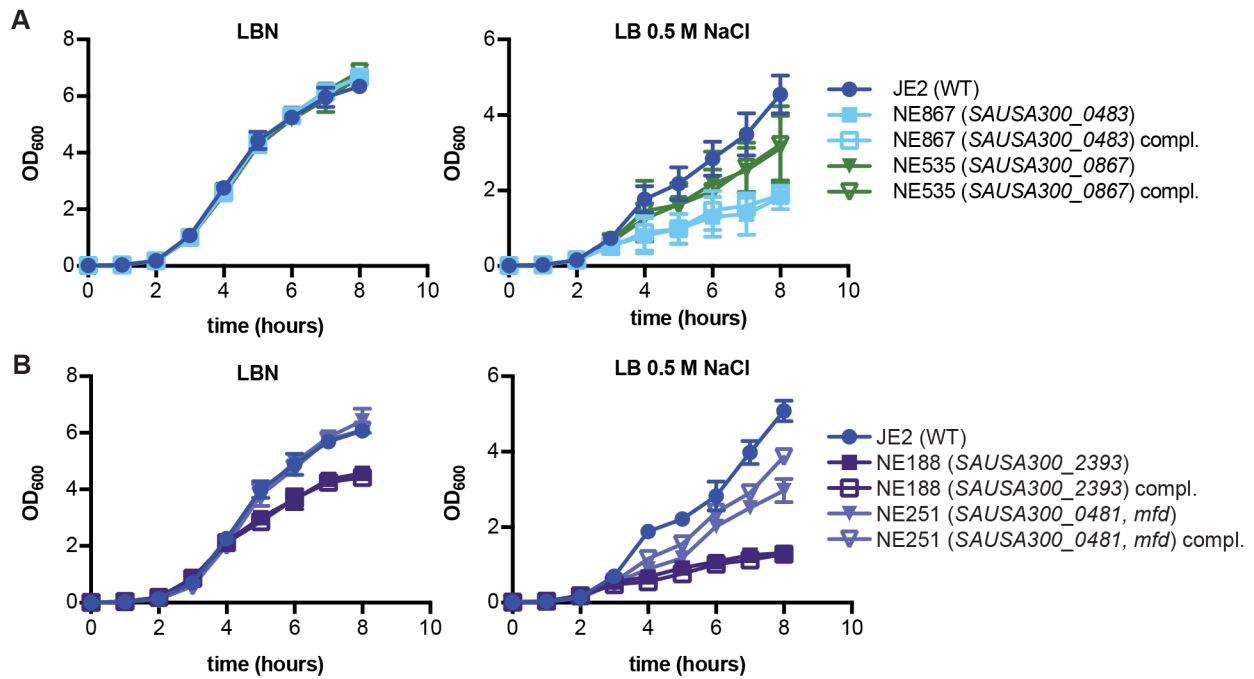

1293

1294 **Supplementary Fig. 4. Complementation analysis using *S. aureus* mutants with transposon**  
1295 **insertions in putative salt resistance genes.**

1296 (A) Growth curves. *S. aureus* strains JE2 (WT), NE867 and NE535 with integrated pCL55 and *S. aureus*  
1297 strains NE867 and NE535 with respective complementation plasmids were grown in either LBN or  
1298 LB 0.5 M NaCl and their growth monitored by determining OD<sub>600</sub> readings.

1299 (B) As in (A) but using strains JE2 pTET (WT) or NE188 and NE251 containing plasmid pTET or the  
1300 respective complementation plasmid. Strains were grown in LBN or 0.5 M NaCl LB medium  
1301 supplemented with 100 ng/ml Atet. All experiments were conducted three times and the means  
1302 and standard deviations were plotted.

1303

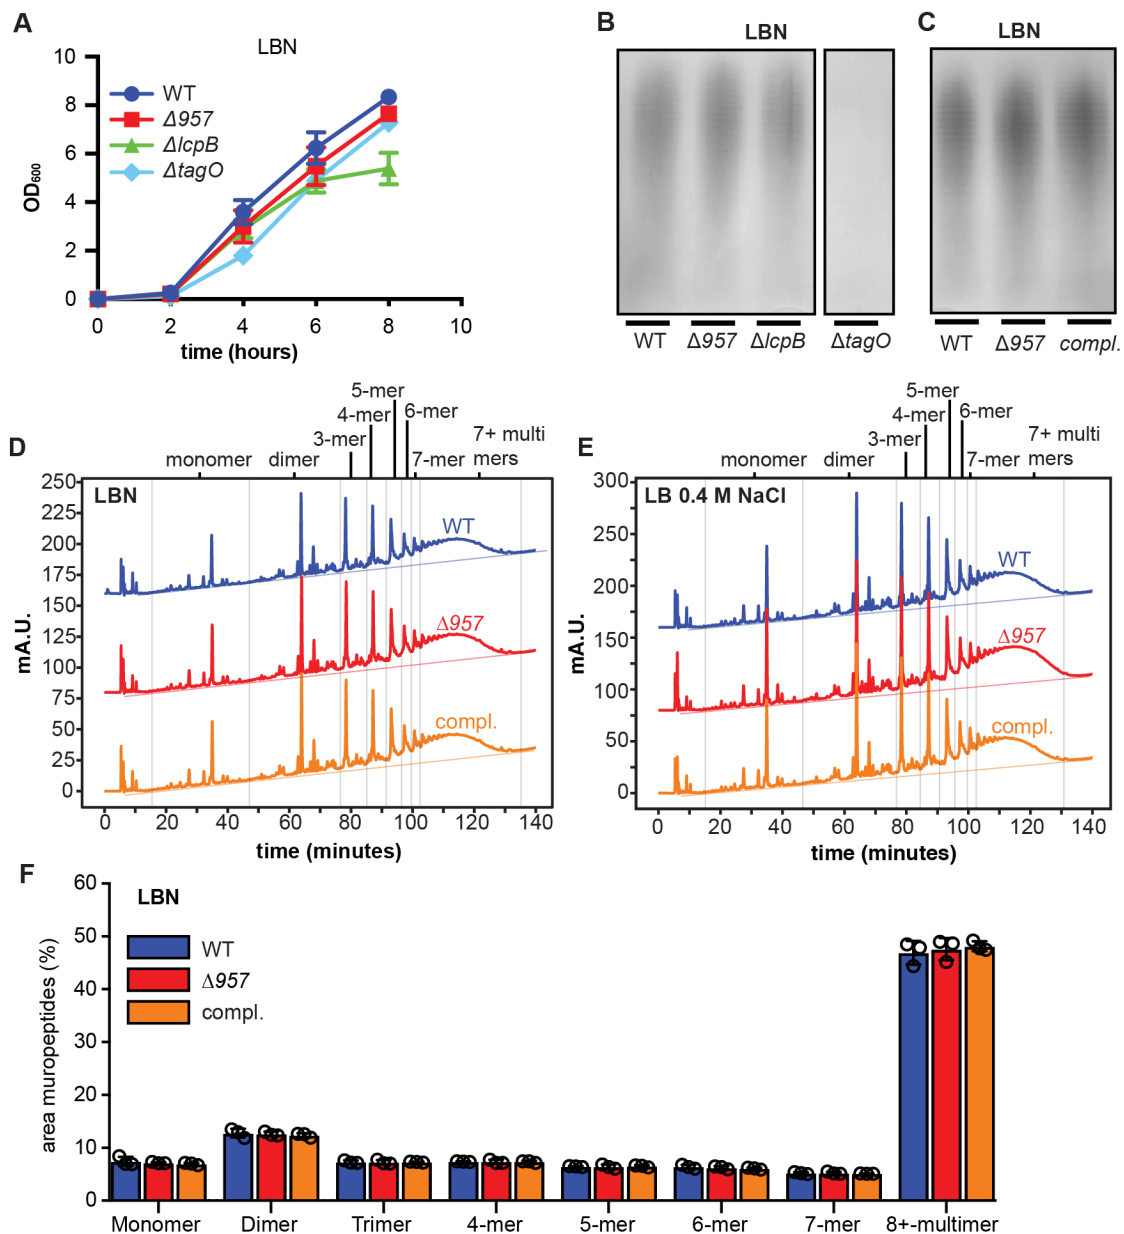

1304

1305 **Supplementary Fig. 5. Investigating the involvement of gene 957 in cell wall homeostasis.**

1306 (A) Growth curves using strains with mutations in WTA synthesis genes. *S. aureus* strains LAC\* (WT),

1307 LAC\*Δ957 (Δ957), LAC\*ΔlcpB (ΔlcpB) and LAC\*ΔtagO (ΔtagO) were grown in LBN and growth

1308 monitored by measuring OD<sub>600</sub> readings. The experiment was performed three times and means

1309 and standard deviations were plotted.

1310 (B) Detection of WTA. WTA was isolated from the strains described in (A) following growth in LBN

1311 medium, then subjected to electrophoresis on polyacrylamide gels and visualized by silver staining.

1312 One representative result is shown out of three independent experiments.

1313 (C) Detection of WTA. Experimental setup is the same as in (B) but using the strains LAC\* piTET (WT),  
1314 LAC\* $\Delta$ 957 piTET ( $\Delta$ 957) and LAC\*  $\Delta$ 957 piTET-957 (compl.).

1315 (D) Muropeptide profile. The same strains as described in panel (C) were grown in LBN medium and  
1316 the peptidoglycan isolated, digestion with mutanolysin and the muropeptides subsequently  
1317 separated by HPLC. Shown are representative chromatograms from three independent  
1318 experiments. Retention time ranges of mono-, di- and higher multi-mers are indicated by vertical  
1319 lines.

1320 (E) Muropeptide profiles. As in (D) but bacteria were grown in LB 0.4 M NaCl.

1321 (F) Muropeptide quantification. The areas under the peaks from the chromatograms shown in panel  
1322 (D) and two additional replicates were quantified for each mono-, di- or multimer area. Bars  
1323 represent mean and error bars standard deviations from three independent experiments. For  
1324 statistical analyses, a two-way ANOVA was performed, followed by a Dunnett's post-hoc test but no  
1325 significant changes were present between either the wild type and the mutant or the wild type and  
1326 the deletion strain. Where induction was necessary, the medium was supplemented with 100 ng/ $\mu$ l  
1327 Atet.

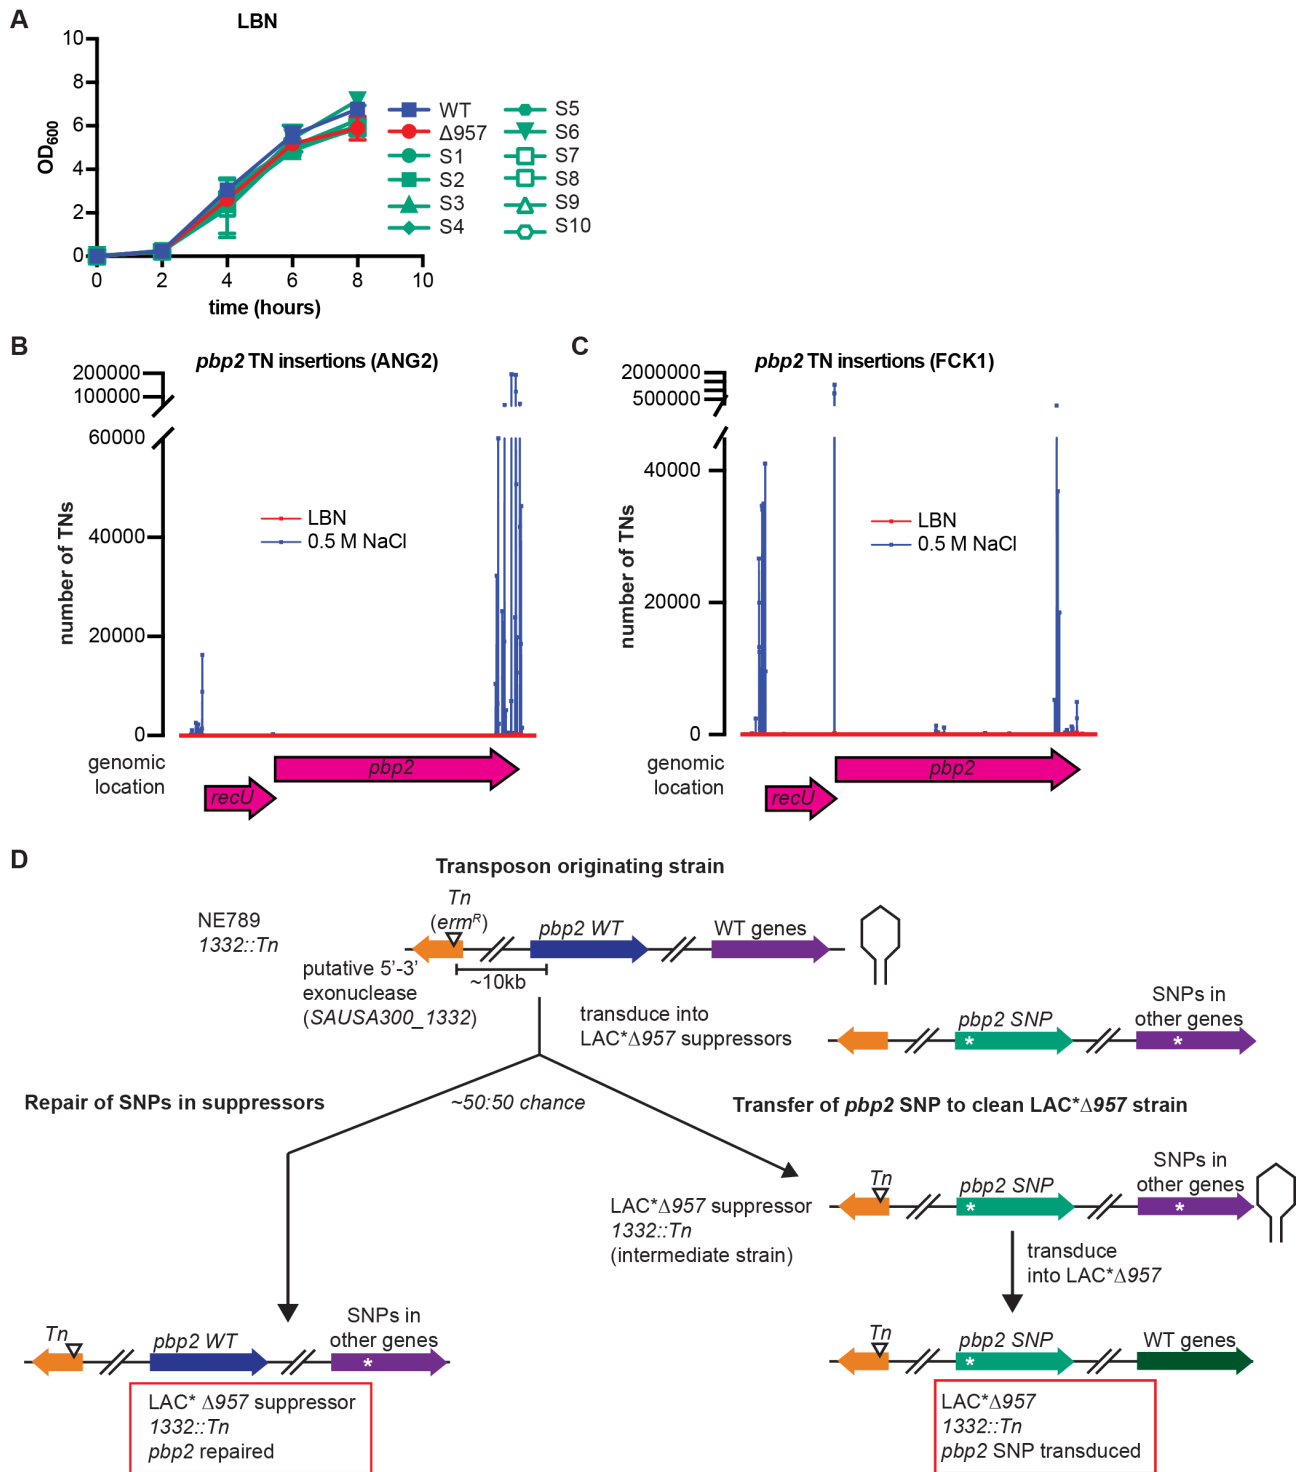

1333 taking OD<sub>600</sub> readings. The experiment was performed three times and means and standard  
1334 deviations were plotted.

1335 (B) TN insertion map. Transposon insertions from replicate A (ANG dataset) were mapped to the  
1336 *recU/pbp2* operon from a library grown in LBN (red) or LB medium containing 0.5 M NaCl salt (blue).

1337 (C) TN insertion map. As in (B) but using replicate B (FCK dataset).

1338 (D) Schematic of phage co-transduction experiment to either repair the *pbp2* SNP in the suppressor  
1339 strains (left branch) or to transduce the *pbp2* suppressor mutations into a clean 957 mutant (right  
1340 branch). A phage lysate was prepared using an NTML library strain with a transposon insertion in an  
1341 unrelated gene (*SAUSA300\_1332*) located approximately 10 kb from the *pbp2* SNPs present in the  
1342 suppressor strains. This lysate was used for transductions using different LAC\* $\Delta$ 957 suppressor  
1343 strains as recipient strains. With about 50% frequency, the *pbp2* SNPs were exchanged to the wild  
1344 type allele by transducing *SAUSA300\_1332::Tn* and the WT *pbp2* allele producing strain LAC\* $\Delta$ 957  
1345 suppressor *1332::Tn pbp2* repaired (left branch). In the other cases, the *SAUSA300\_1332::Tn* region  
1346 was transferred to a suppressor strain without replacing the *pbp2* SNP (right branch). A phage lysate  
1347 prepared on this intermediate strain (LAC\* $\Delta$ 957 suppressor *1332::Tn*) was then used to transduce  
1348 the *pbp2* suppressor SNP into a clean LAC\* $\Delta$ 957 strain, resulting in the clean suppressor strain  
1349 LAC\* $\Delta$ 957 *1332::Tn pbp2* SNP transduced.

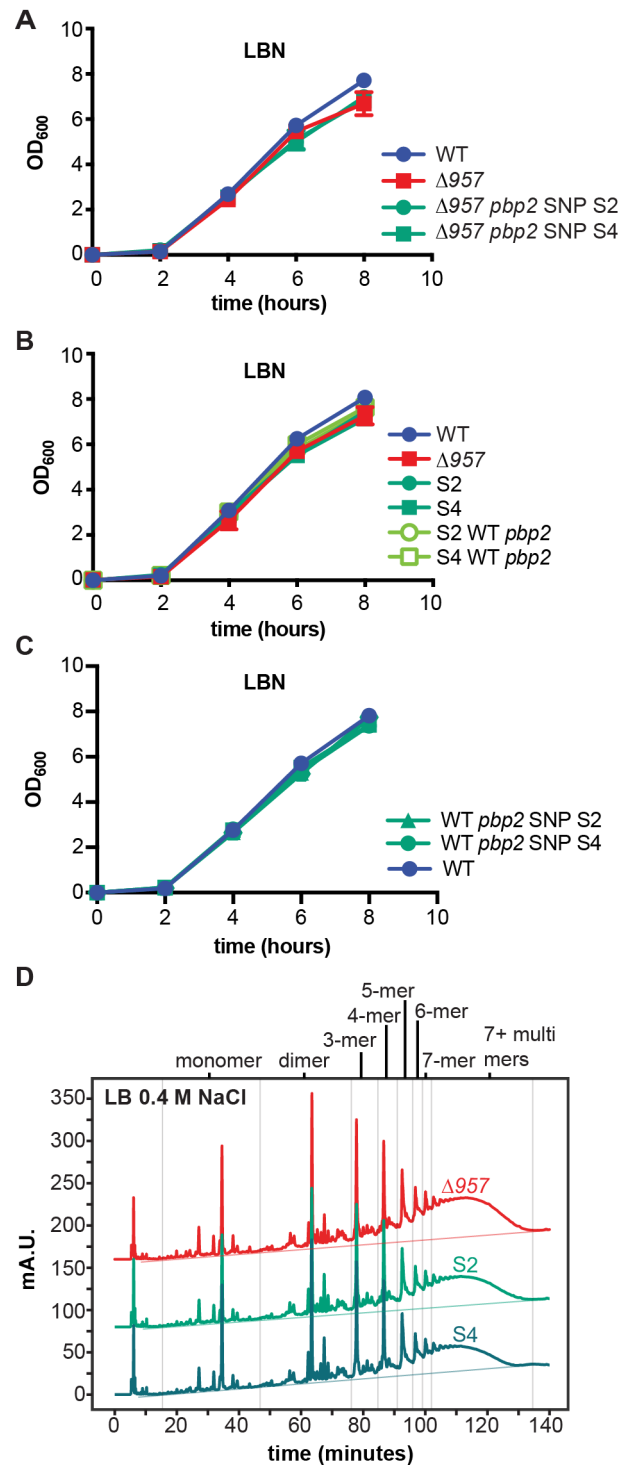

1350

1351 **Supplementary Fig. 7. Growth and peptidoglycan analysis of 957 mutant and suppressor strains.**

1352 (A) Growth curves using 957 mutants with transduced *pbp2* SNPs. Strains LAC\* 1332::Tn (WT),

1353 LAC\*Δ957 1332::Tn (Δ957), LAC\*Δ957 1332::Tn *pbp2* SNP S2 (Δ957 *pbp2* SNP S2), LAC\*Δ957

1354 suppressor S4 1332::Tn (Δ957 *pbp2* SNP S4) were grown in LBN medium and growth monitored by

1355 determining OD<sub>600</sub> readings. The means and standard deviations from three independent  
1356 experiments were plotted.

1357 (B) Growth curves using 957 suppressor strains carrying a repaired WT *pbp2* gene. Same as in (A)  
1358 but using strains LAC\* 1332::Tn (WT), LAC\*Δ957 1332::Tn (Δ957), LAC\*Δ957 suppressor S2 1332::Tn  
1359 (S2), LAC\*Δ957 suppressor S4 1332::Tn (S4), LAC\*Δ957 suppressor S2 1332::Tn repaired WT *pbp2*  
1360 (S2 WT *pbp2*), and LAC\*Δ957 suppressor S4 1332::Tn repaired WT *pbp2* (S4 WT *pbp2*).

1361 (C) Growth curves using WT strains carrying *pbp2* SNP mutations. Same as in (A) but using strains  
1362 LAC\* 1332::Tn (WT), LAC\* 1332::Tn *pbp2* SNP S2 (WT *pbp2* SNP S2) and LAC\* 1332::Tn *pbp2* SNP S4  
1363 (WT *pbp2* SNP S4).

1364 (D) Muropeptide profiles. Strains LAC\*Δ957 (Δ957), LAC\*Δ957 Suppressor S2 (S2) and S4 LAC\*Δ957  
1365 Suppressor S4 (S4) were grown in LB medium with 0.4 M NaCl, the peptidoglycan was extracted,  
1366 digested with mutanolysin, and the muropeptide separated by HPLC. Retention ranges for  
1367 monomers, di- and higher oligomers are indicated by vertical lines. The experiment was conducted  
1368 with three times and one representative result is shown.



Conditionally dispensable genes

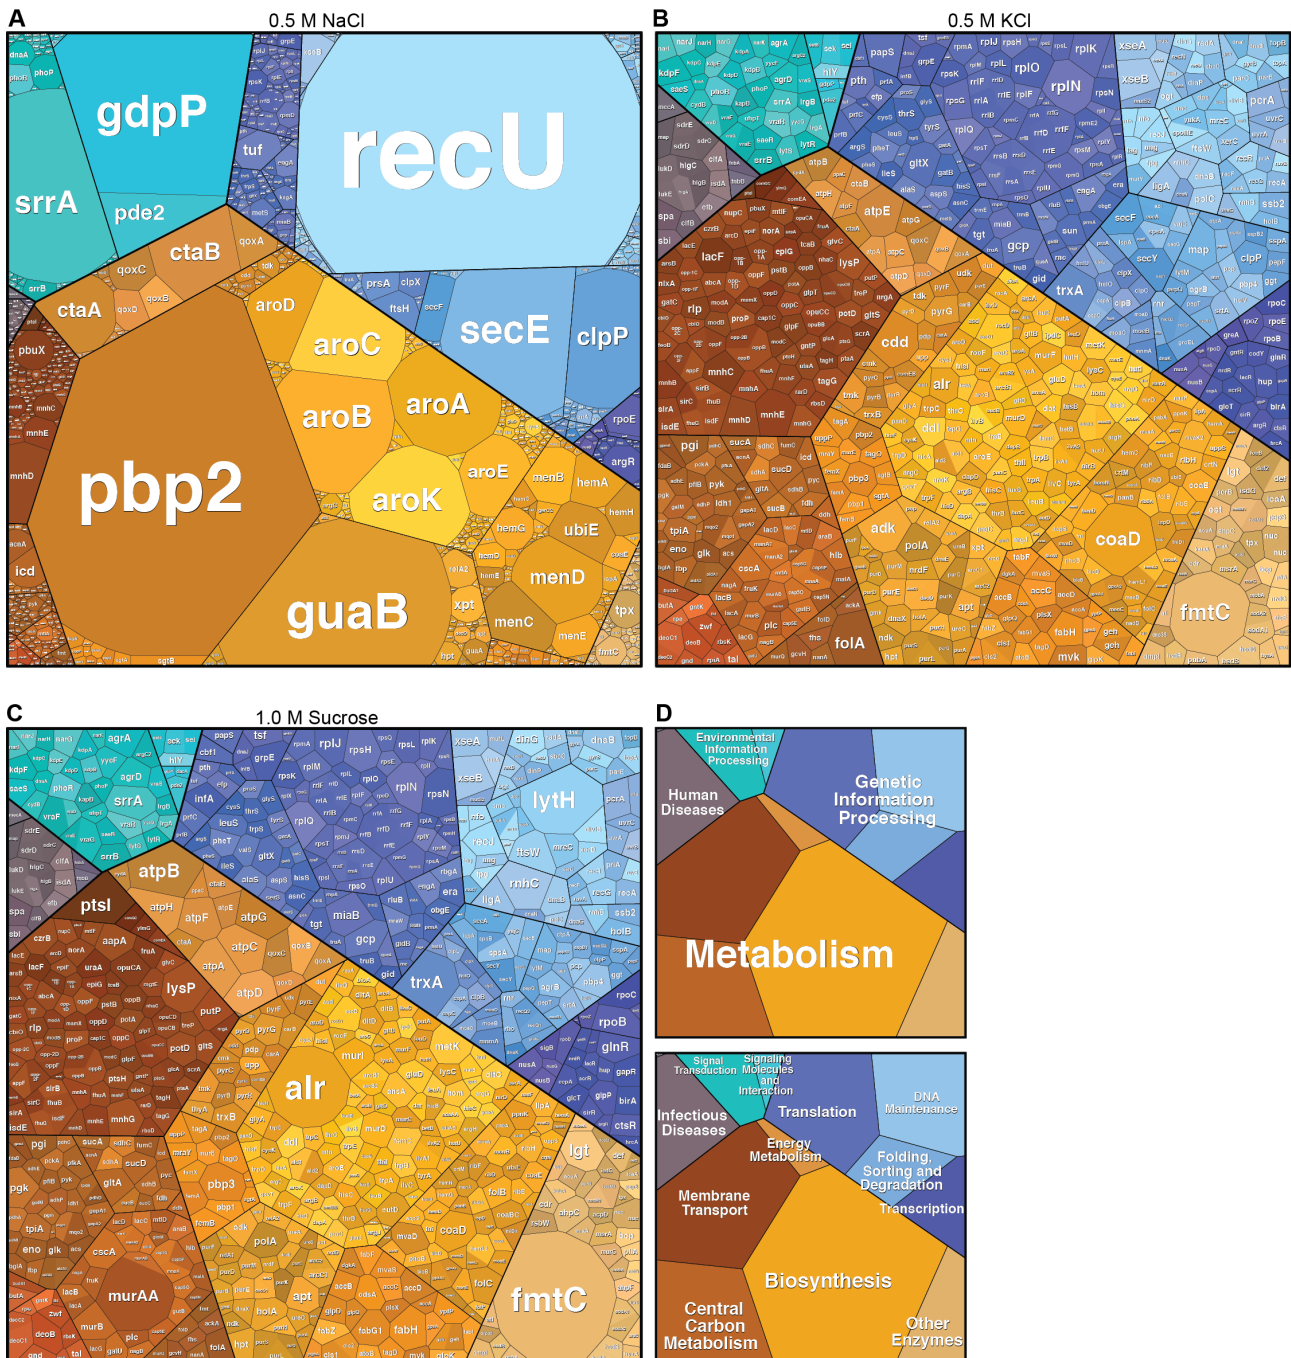

1369

1370 **Supplementary Fig. 8. Voronoi diagram-based visualization of conditionally dispensable *S. aureus***  
 1371 **genes when exposed to different osmotic stressors.**

1372 Conditionally dispensable genes of *S. aureus* strains grown either in 0.5 M NaCl (A), 0.5 M KCl (B) or  
 1373 1.0 M sucrose (C) were mapped to cellular functions with area sizes adjusted to their essentiality  
 1374 regardless of p- or q-value. The larger the area, the higher the number of transposon insertions in

1375 relation to the LBN control. *recU* was scaled to 1/10 of the original ratio to preserve space. Colors  
1376 of polygons indicate cellular functions as detailed in (D).  
1377
